# Supplementary material
Source: publisher figshare collection journal article supplement (https://acs.figshare.com/ndownloader/files/15347861)
Supplement: Supplementary file 1 [file 15347861]

## Supporting Information

### **Stereocontrolled synthesis of boranophosphate DNA by an oxazaphospholidine approach and evaluation of its properties**

Rintaro Iwata Hara,<sup>§,¶</sup> Tatsuya Saito,<sup>§</sup> Tomoki Kogure,<sup>§</sup> Yuka Hamamura,<sup>‡</sup> Naoki Uchiyama,<sup>‡</sup> Yohei Nukaga,<sup>§</sup> Naoki Iwamoto,<sup>‡</sup> and Takeshi Wada<sup>§,\*</sup>

<sup>§</sup>Faculty of Pharmaceutical Sciences, Tokyo University of Science, 2641 Yamazaki, Noda, Chiba 278-8510, Japan.

<sup>¶</sup>Department of Neurology and Neurological Science, Graduate School of Medical and Dental Sciences, Tokyo Medical and Dental University, 1-5-45 Yushima, Bunkyo-ku, Tokyo 113-8519, Japan

<sup>‡</sup>Graduate School of Frontier Sciences, The University of Tokyo, 5-1-5 Kashiwanoha, Kashiwa, Chiba 277-8562, Japan.

\*twada@rs.tus.ac.jp

## **Table of Contents**

|                                     |     |
|-------------------------------------|-----|
| General procedures of experiments   | S3  |
| HPLC profiles and UV melting curves | S5  |
| NMR spectra                         | S15 |

### General Procedure for Manual Solid-Phase Synthesis of PB-DNA

PB-DNA was conducted manually using a small glass filter with a stopper at the top and a stopcock at the bottom as a reaction vessel. CPG was used as a solid support. Synthesis was conducted according to Table S1 from DMTr-T-succinyl-CPG (39  $\mu\text{mol/g}$ ) as the starting material.

Table S1 Standard conditions for manual solid-phase synthesis of PB-DNA

| step                                                                  | manipulation                       | reagents and solvents                                                                     | time            |
|-----------------------------------------------------------------------|------------------------------------|-------------------------------------------------------------------------------------------|-----------------|
| 1                                                                     | detritylation                      | 1% TFA in $\text{CH}_2\text{Cl}_2$                                                        | 15 s $\times$ 4 |
| 2                                                                     | wash                               | (1) $\text{CH}_2\text{Cl}_2$ (2) $\text{CH}_3\text{CN}$                                   | ---             |
| 3                                                                     | drying                             | ---                                                                                       | 5 min           |
| 4                                                                     | condensation                       | monomer units (0.2 M), CMPT (1.0 M) / $\text{CH}_3\text{CN}$                              | 5 min           |
| 5                                                                     | wash                               | (1) $\text{CH}_3\text{CN}$ (2) $\text{CH}_2\text{Cl}_2$                                   | ---             |
| 6                                                                     | drying                             | ---                                                                                       | 5 min           |
| 7                                                                     | removal of DMTr, auxiliary and PRO | 1% TFA in $\text{CH}_2\text{Cl}_2$ - $\text{Et}_3\text{SiH}$ (1:1, v/v)                   | 30 s $\times$ 4 |
| 8                                                                     | wash                               | (1) $\text{CH}_2\text{Cl}_2$ (2) $\text{CH}_3\text{CN}$                                   | ---             |
| 9                                                                     | drying                             | ---                                                                                       | 5 min           |
| <i>repeat steps 4-9 in order to synthesize the objective sequence</i> |                                    |                                                                                           |                 |
| 10                                                                    | boronation                         | $\text{BH}_3 \cdot \text{SMe}_2$ -BSA-DMAc (1:1:8, v/v/v)                                 | 15 min          |
| 11                                                                    | wash                               | (1) DMAc (2) $\text{CH}_3\text{CN}$                                                       | ---             |
| 12                                                                    | release from the CPG               | conc $\text{NH}_3\text{aq}$ -EtOH (3:1, v/v, 25 $^\circ\text{C}$ or 55 $^\circ\text{C}$ ) | 3 h or 12 h     |

### Conditions for UV Melting Analyses

The absorbance-versus-temperature profiles were measured using an eight-sample cell changer, in quartz cells of 1 cm path length. All experiments were conducted in a 10 mM phosphate buffer containing 100 mM NaCl at pH 7.0. The UV absorbance at 260 and 320 nm was monitored with temperature. Samples containing oligonucleotides were first rapidly heated to 95  $^\circ\text{C}$  followed by cooling down to 0  $^\circ\text{C}$  at a rate of 0.5  $^\circ\text{C}/\text{min}$ . Dissociation was recorded by heating to 95  $^\circ\text{C}$  at a rate of 0.2  $^\circ\text{C}/\text{min}$ .

### SVPDE assay

In the SVPDE assay, phosphodiesterase I from *Crotalus adamanteus* venom was used. SVPDE solution ( $2.0 \times 10^{-3}$  in 45  $\mu\text{L}$ ) and 200 mM Tris-HCl buffer containing 30 mM  $\text{MgCl}_2$  (50  $\mu\text{L}$ ) was added (pH 8.5, 37  $^\circ\text{C}$ ) to 0.1 mM aqueous solution of PO-, PB-, or PS-DNA (5  $\mu\text{L}$ ). After 12 h, the solution was diluted with 0.1 M triethylammonium acetate buffer (80  $\mu\text{L}$ ) acetonitrile (20  $\mu\text{L}$ ), and heated to 100  $^\circ\text{C}$  for 1 h. The mixture was then analyzed using RP-HPLC.

**nP1 assay**

In the nP1 assay, nP1 from *Penicillium citrinum* was used. nP1 solution (1 unit in 45  $\mu\text{L}$ ) and 200 mM Tris-HCl buffer containing 2 mM mM ZnCl<sub>2</sub> (50  $\mu\text{L}$ ) was added (pH 7.5, 37 °C) to 0.1 mM aqueous solution of PO-, PB-, or PS-DNA (5  $\mu\text{L}$ ). After 12 h, the solution was diluted with 0.1 M triethylammonium acetate buffer (80  $\mu\text{L}$ ) and acetonitrile (20  $\mu\text{L}$ ), and heated to 100 °C for 1 h. The mixture was then analyzed using RP-HPLC.



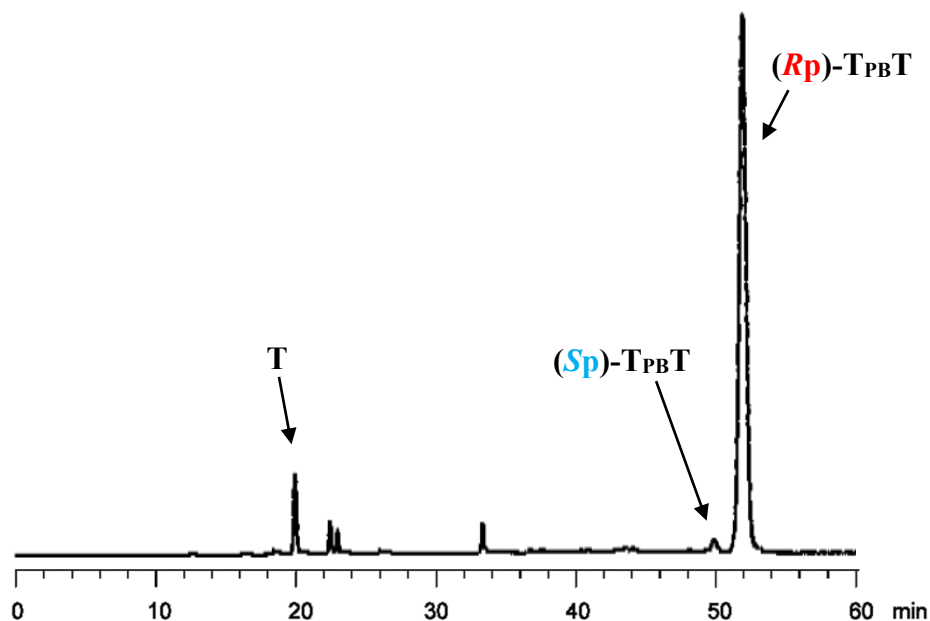

Figure S1 HPLC profile at 260nm of crude (*Rp*)-TPBT (Table 2, Entry 1). RP-HPLC was performed with a linear gradient of 0–10% acetonitrile for 30 min then 10% acetonitrile for 30 min in 0.1 M triethylammonium acetate buffer (pH 7.0) at 30 °C at a flow rate of 0.5 mL/min using a  $\mu$ Bondasphere 5  $\mu$ m C18 column (100 Å, 3.9  $\times$  150 mm) (Waters).

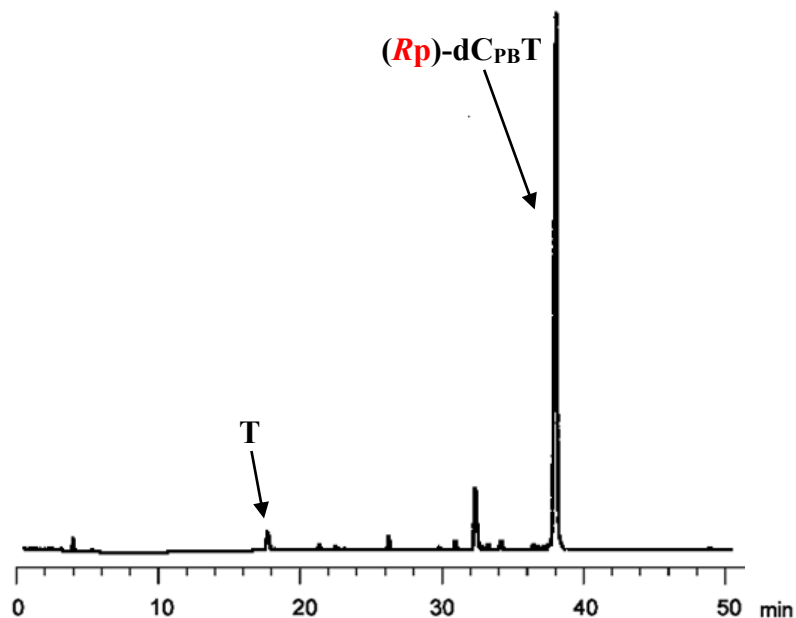

Figure S2 HPLC profile at 260 nm of crude (*Rp*)-dCPBT (Table 2, Entry 2). RP-HPLC was performed with a linear gradient of 0–10% acetonitrile for 30 min then 10% acetonitrile for 20 min in 0.1 M triethylammonium acetate buffer (pH 7.0) at 30 °C at a flow rate of 0.5 mL/min using a  $\mu$ Bondasphere 5  $\mu$ m C18 column (100 Å, 3.9  $\times$  150 mm) (Waters).

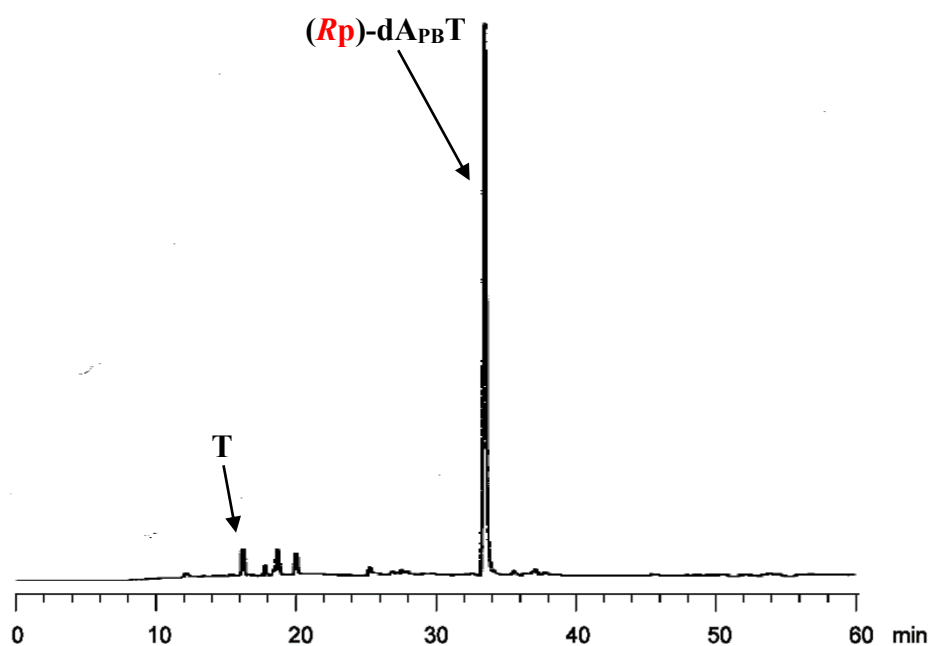

Figure S3 HPLC profile at 260 nm of crude (*Rp*)-dAPBT (Table 2, Entry 3). RP-HPLC was performed with a linear gradient of 0–30% acetonitrile for 60 min in 0.1 M triethylammonium acetate buffer (pH 7.0) at 30 °C at a flow rate of 0.5 mL/min using a  $\mu$ Bondasphere 5  $\mu$ m C18 column (100 Å, 3.9 mm  $\times$  150 mm) (Waters).

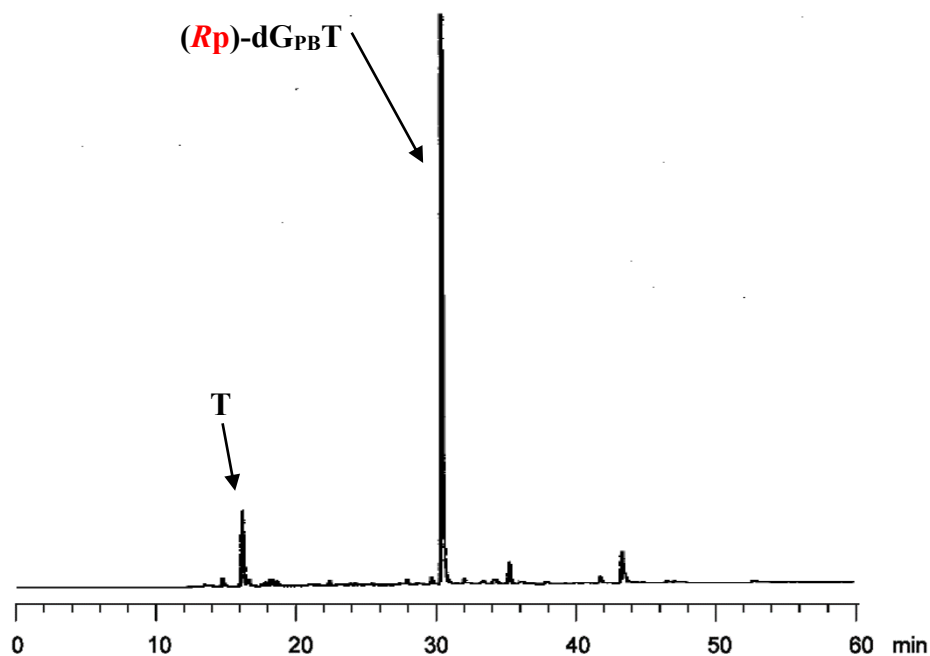

Figure S4 HPLC profile of crude (*Rp*)-dGPBT (Table 2, Entry 4). RP-HPLC was performed with a linear gradient of 0–30% acetonitrile for 60 min in 0.1 M triethylammonium acetate buffer (pH 7.0) at 30 °C at a flow rate of 0.5 mL/min using a  $\mu$ Bondasphere 5  $\mu$ m C18 column (100 Å, 3.9 mm  $\times$  150 mm) (Waters).

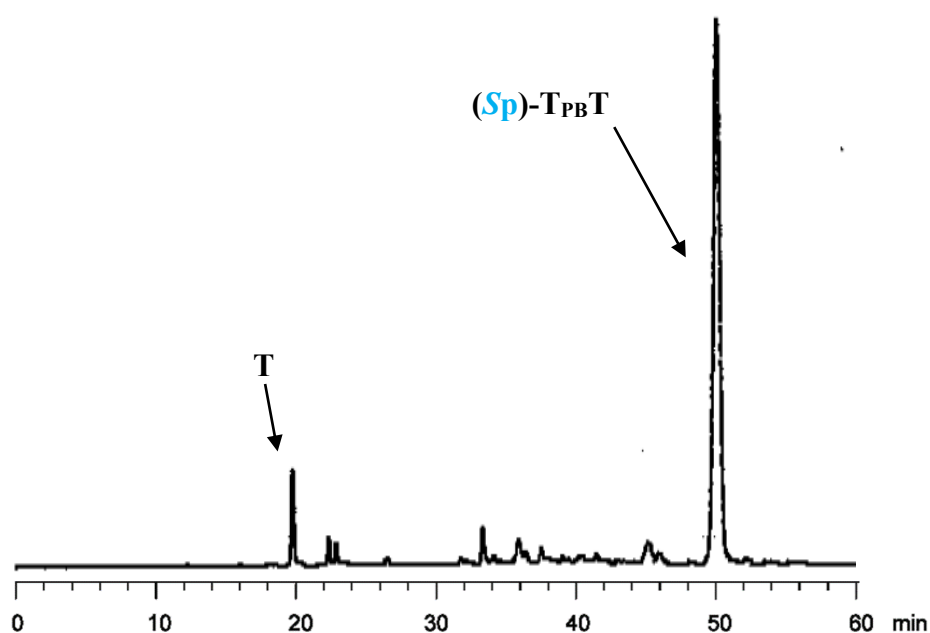

Figure S5 HPLC profile at 260 nm of crude (*Sp*)-TPBT (Table 2, Entry 5). RP-HPLC was performed with a linear gradient of 0–10% acetonitrile for 30 min then 10% acetonitrile for 30 min in 0.1 M triethylammonium acetate buffer (pH 7.0) at 30 °C at a flow rate of 0.5 mL/min using a  $\mu$ Bondasphere 5  $\mu$ m C18 column (100 Å, 3.9  $\times$  150 mm) (Waters).

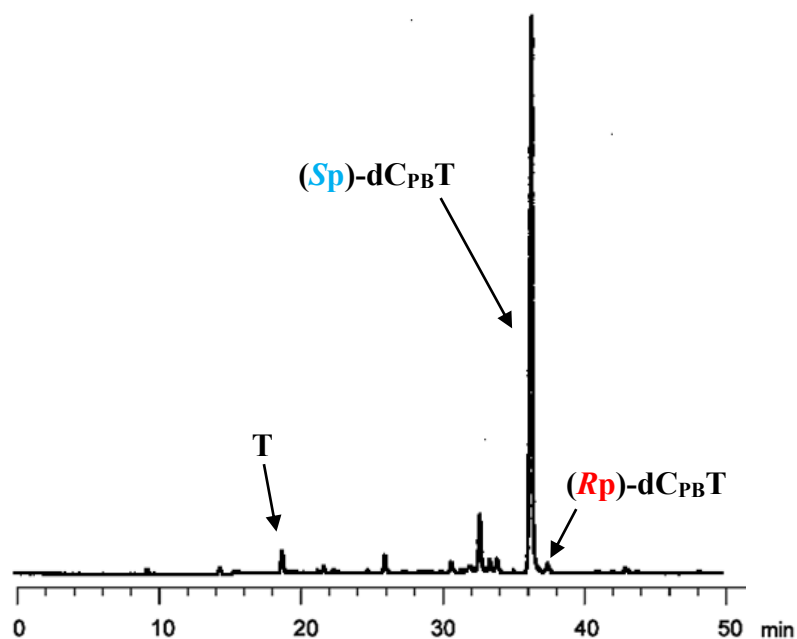

Figure S6 HPLC profile at 260 nm of crude (*Sp*)-dCPBT (Table 2, Entry 6). RP-HPLC was performed with a linear gradient of 0–10% acetonitrile for 30 min then 10% acetonitrile for 20 min in 0.1 M triethylammonium acetate buffer (pH 7.0) at 30 °C at a flow rate of 0.5 mL/min using a  $\mu$ Bondasphere 5  $\mu$ m C18 column (100 Å, 3.9  $\times$  150 mm) (Waters).

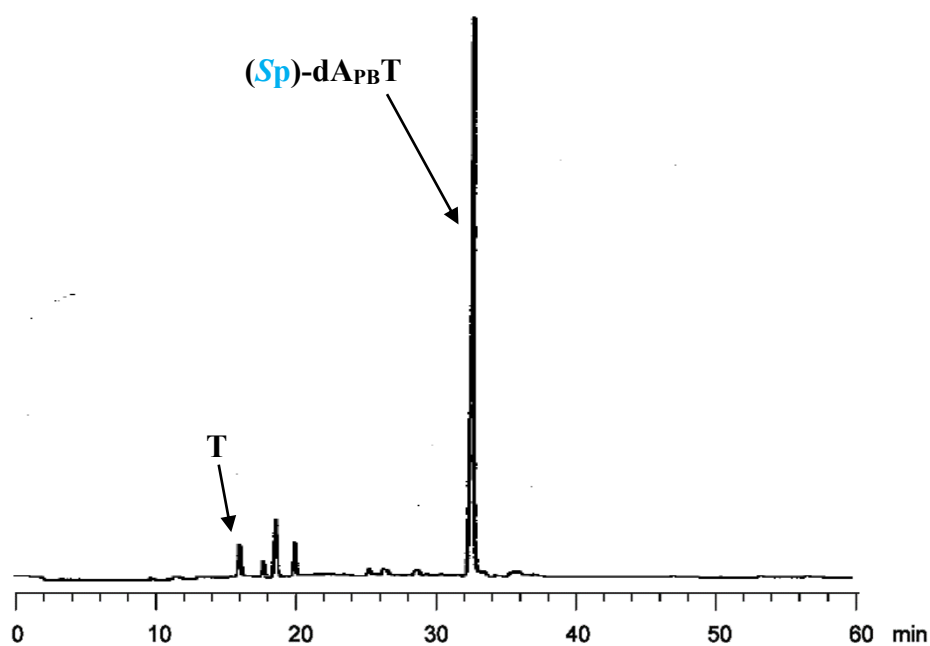

Figure S7 HPLC profile of at 260 nm crude (*Sp*)-dAPBT (Table 2, Entry 7). RP-HPLC was performed with a linear gradient of 0–30% acetonitrile for 60 min in 0.1 M triethylammonium acetate buffer (pH 7.0) at 30 °C at a flow rate of 0.5 mL/min using a  $\mu$ Bondasphere 5  $\mu$ m C18 column (100 Å, 3.9 mm  $\times$  150 mm) (Waters).

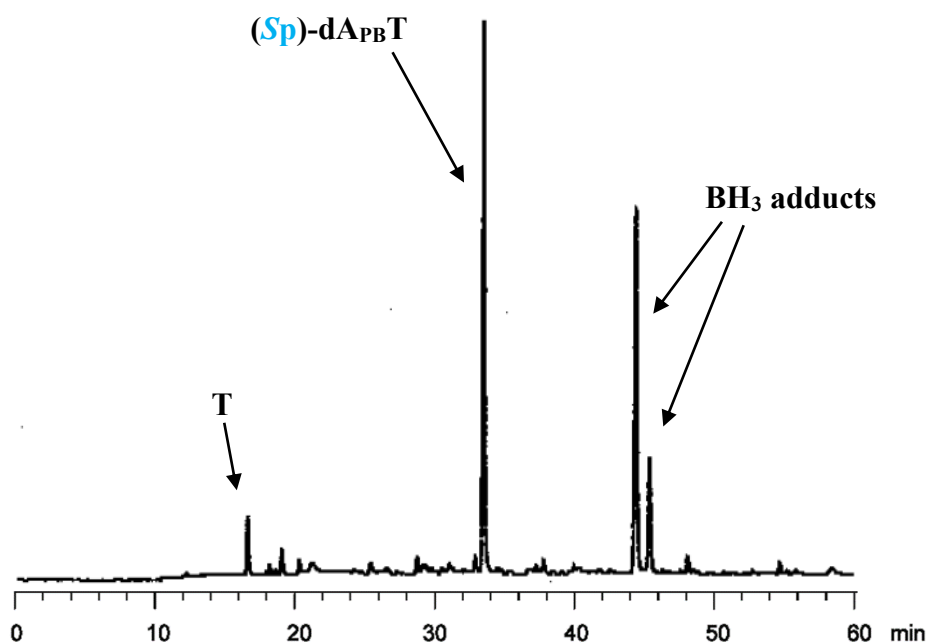

Figure S8 HPLC profile of at 260 nm crude (*Sp*)-dAPBT after ammonia treatment for 25 °C, 3 h. RP-HPLC was performed with a linear gradient of 0–30% acetonitrile for 60 min in 0.1 M triethylammonium acetate buffer (pH 7.0) at 30 °C at a flow rate of 0.5 mL/min using a  $\mu$ Bondasphere 5  $\mu$ m C18 column (100 Å, 3.9 mm  $\times$  150 mm) (Waters)

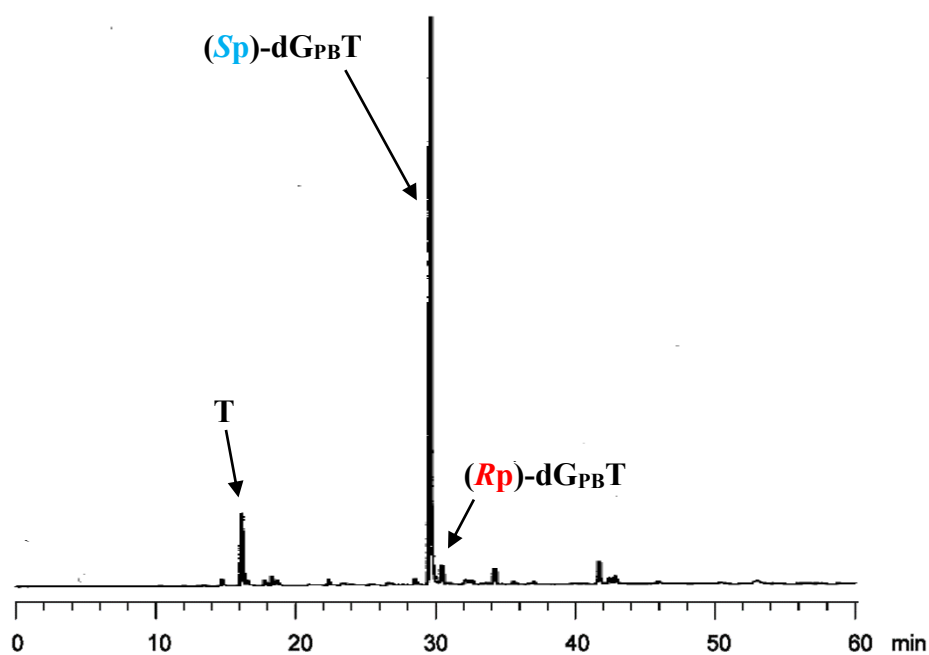

Figure S9 HPLC profile at 260 nm of crude (*Sp*)-dGPBT (Table 2, Entry 8). RP-HPLC was performed with a linear gradient of 0–30% acetonitrile for 60 min in 0.1 M triethylammonium acetate buffer (pH 7.0) at 30 °C at a flow rate of 0.5 mL/min using a  $\mu$ Bondasphere 5  $\mu$ m C18 column (100 Å, 3.9 mm  $\times$  150 mm) (Waters).

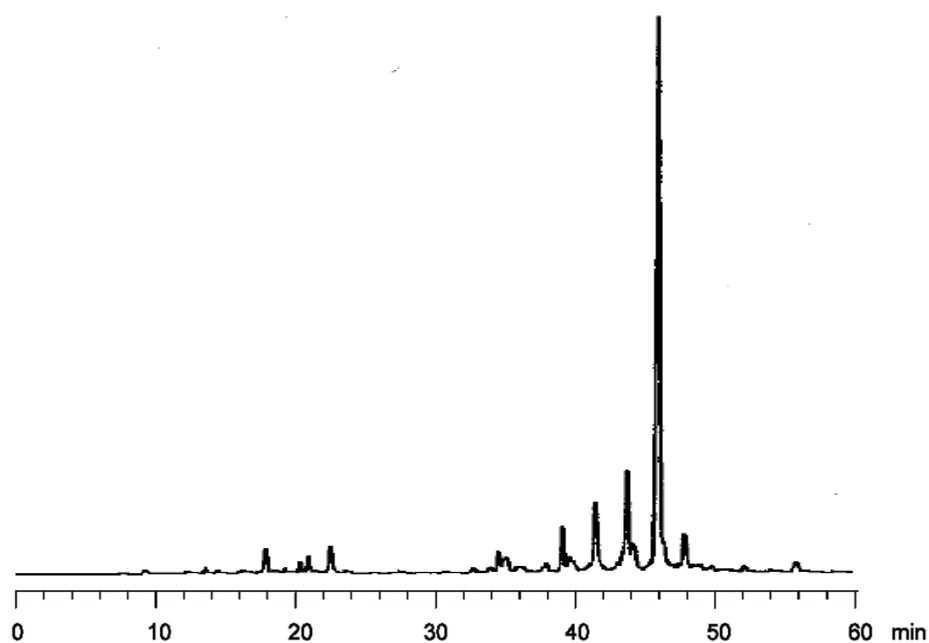

Figure S10 HPLC profile at 260 nm of crude all-(*Rp*)-d(C<sub>PBA</sub>P<sub>B</sub>G<sub>PB</sub>T). RP-HPLC was performed with a linear gradient of 0–20% acetonitrile for 60 min in 0.1 M triethylammonium acetate buffer (pH 7.0) at 30 °C at a flow rate of 0.5 mL/min using a  $\mu$ Bondasphere 5  $\mu$ m C18 column (100 Å, 3.9 mm  $\times$  150 mm) (Waters).

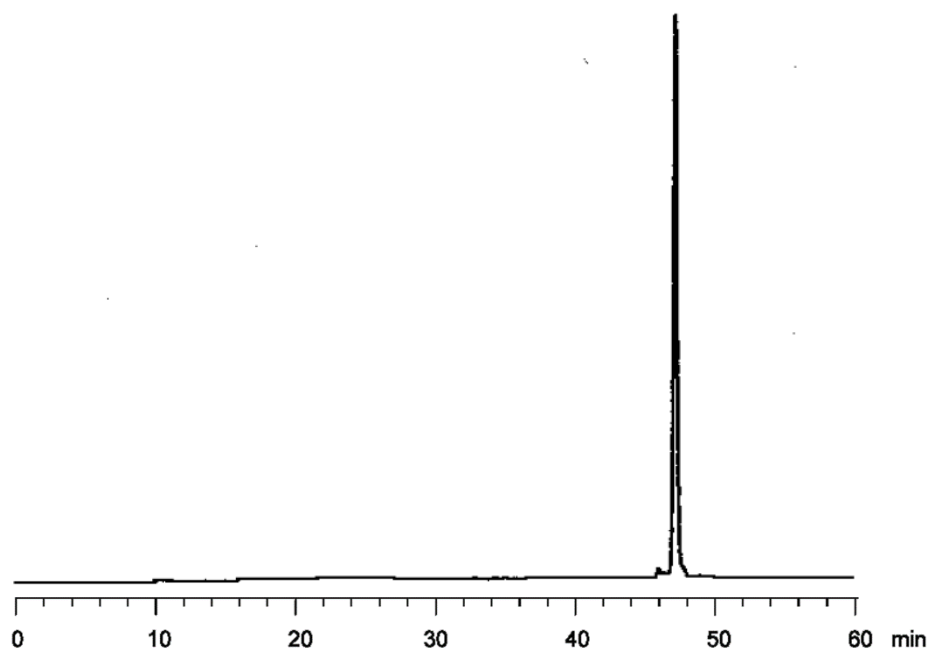

Figure S11 HPLC profile at 260 nm of purified all-(*Rp*)-d(C<sub>PBA</sub>P<sub>B</sub>G<sub>PB</sub>T). RP-HPLC was performed with a linear gradient of 0–20% acetonitrile for 60 min in 0.1 M triethylammonium acetate buffer (pH 7.0) at 30 °C at a flow rate of 0.5 mL/min using a  $\mu$ Bondasphere 5  $\mu$ m C18 column (100 Å, 3.9 mm  $\times$  150 mm) (Waters).

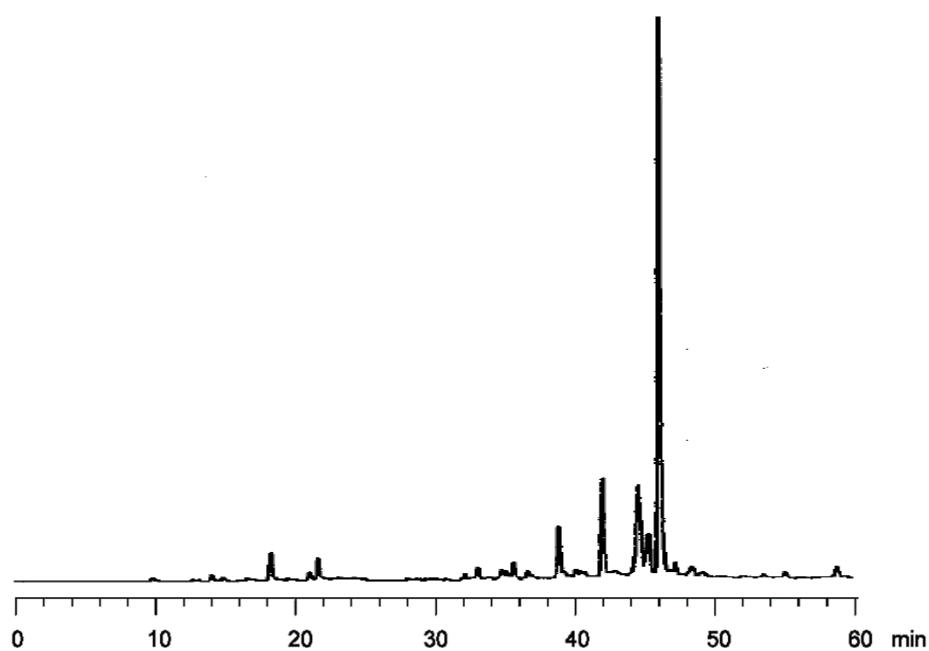

Figure S12 HPLC profile at 260 nm of crude all-(*Sp*)-d(C<sub>PB</sub>A<sub>PB</sub>G<sub>PB</sub>T). RP-HPLC was performed with a linear gradient of 0–20% acetonitrile for 60 min in 0.1 M triethylammonium acetate buffer (pH 7.0) at 30 °C at a flow rate of 0.5 mL/min using a  $\mu$ Bondasphere 5  $\mu$ m C18 column (100 Å, 3.9 mm  $\times$  150 mm) (Waters).

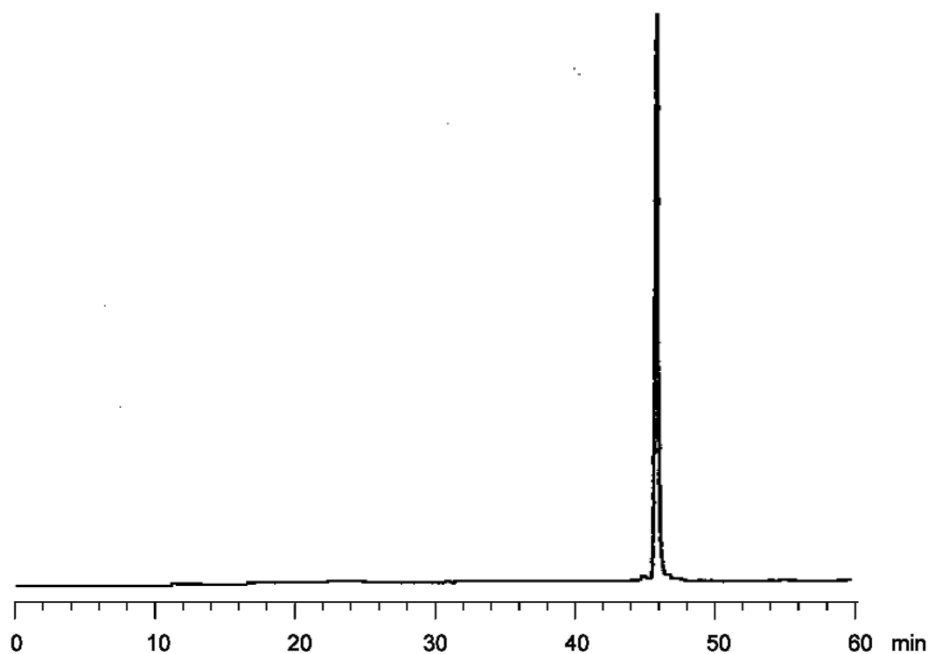

Figure S13 HPLC profile at 260 nm of purified all-(*Sp*)-d(C<sub>PB</sub>A<sub>PB</sub>G<sub>PB</sub>T). RP-HPLC was performed with a linear gradient of 0–20% acetonitrile for 60 min in 0.1 M triethylammonium acetate buffer (pH 7.0) at 30 °C at a flow rate of 0.5 mL/min using a  $\mu$ Bondasphere 5  $\mu$ m C18 column (100 Å, 3.9 mm  $\times$  150 mm) (Waters).

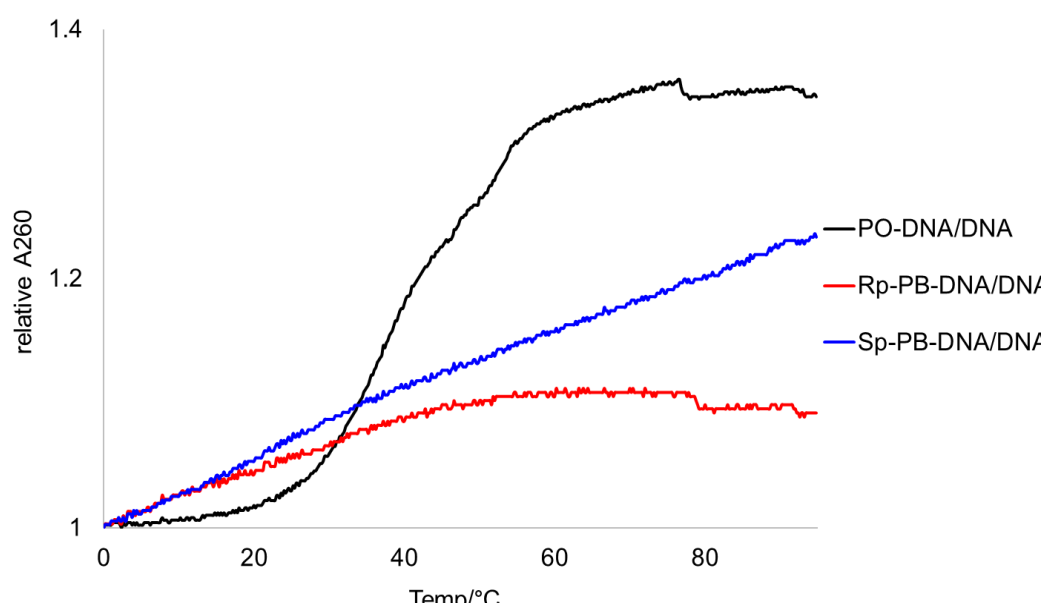

Figure S14 UV melting curves of the duplexes of PO- or PB- DNA 12mer and their complementary RNA 12mer.



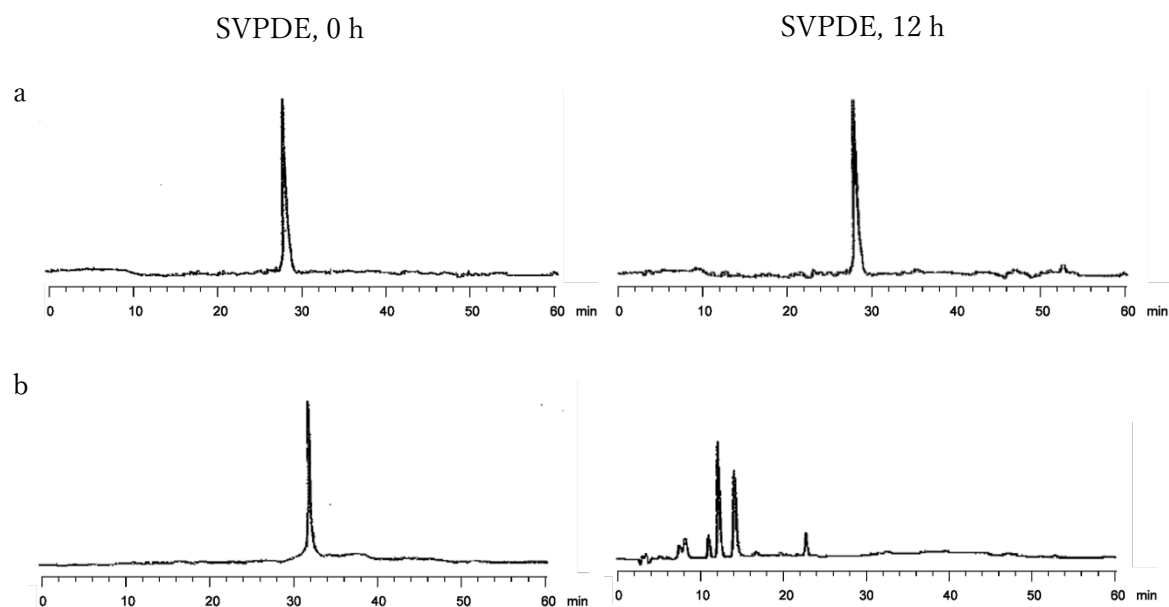

Figure S15 RP-HPLC profiles of DNA 12mers after treatment with SVPDE: (a) all-(*Rp*)-PS-DNA 12mer (b) all-(*Sp*)-PS-DNA 12mer

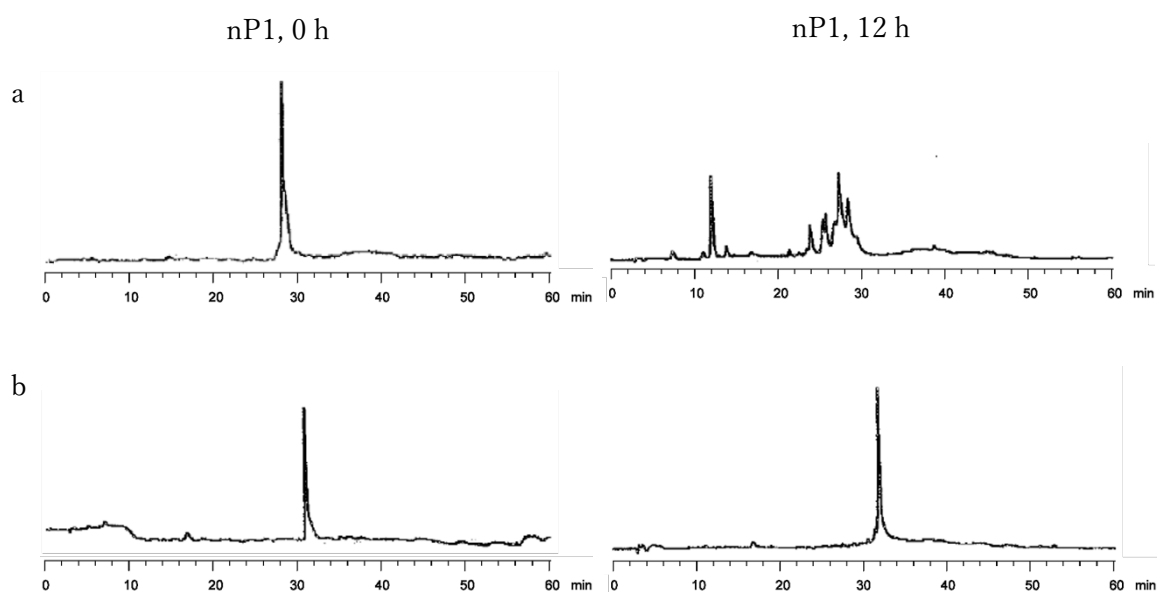

Figure S16 RP-HPLC profiles of DNA 12mers after treatment with nP1: (a) all-(*Rp*)-PS-DNA 12mer (b) all-(*Sp*)-PS-DNA 12mer

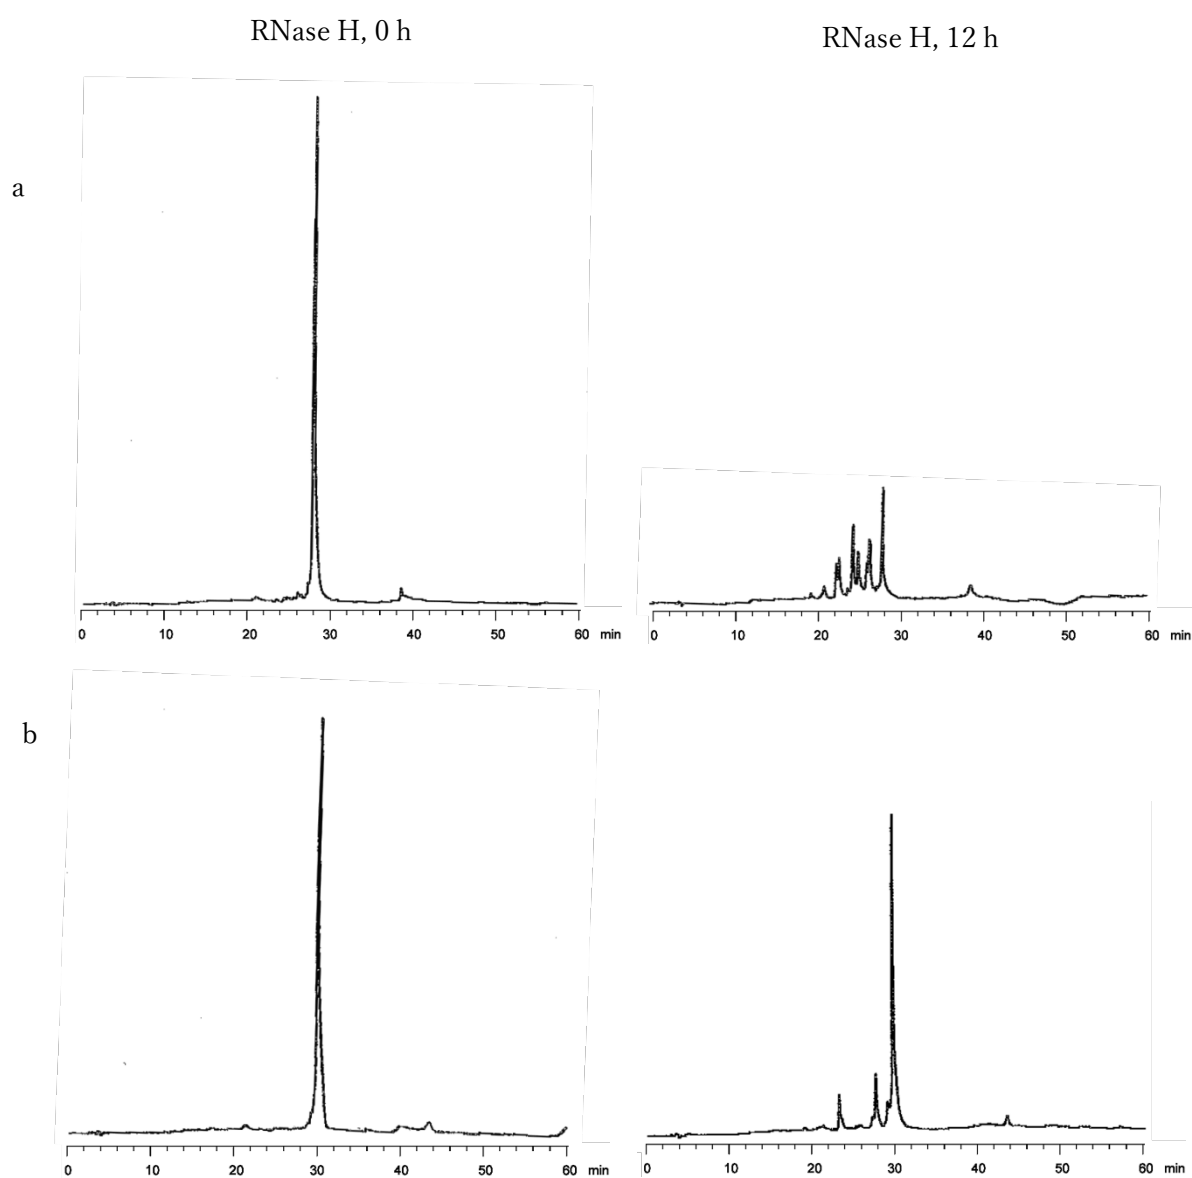

Figure S17 RP-HPLC profiles of RNA 12mers after treatment with nP1 in the presence of (a) all-(*Rp*)-PS-DNA 12mer (c) all-(*Sp*)-PS-DNA 12mer.

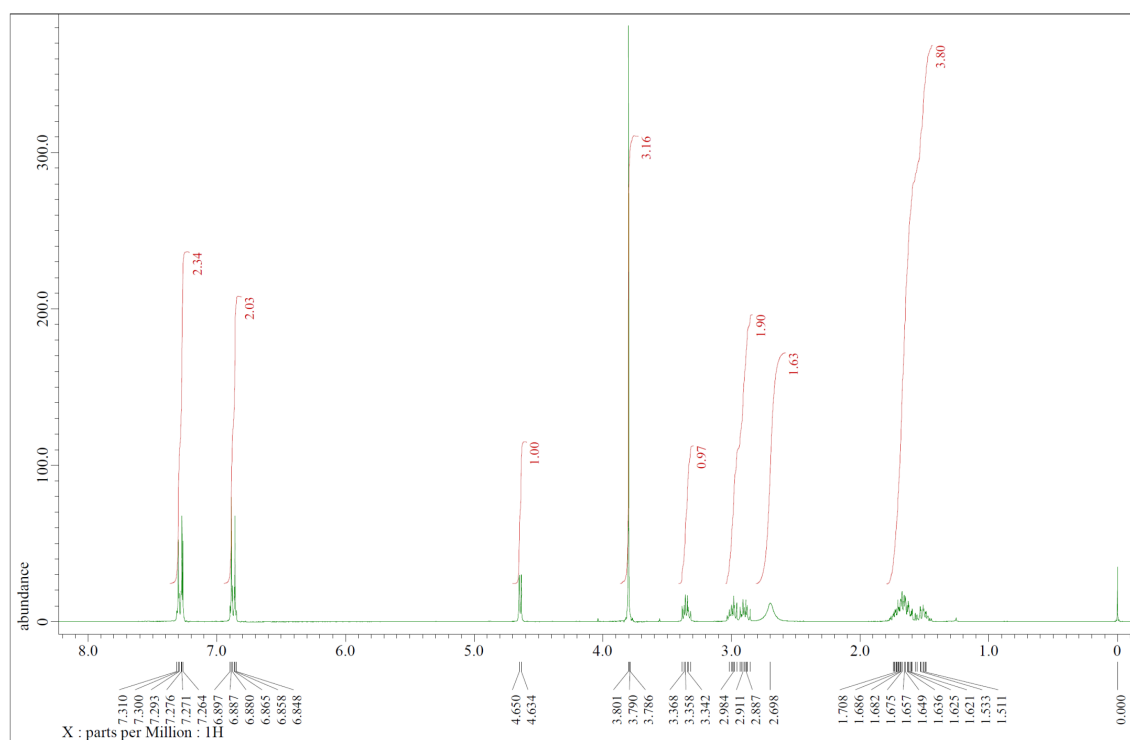

Figure S18  $^1\text{H}$  NMR spectra of ( $\alpha R,2S$ )-7 ( $\text{CDCl}_3$ , 300 MHz)

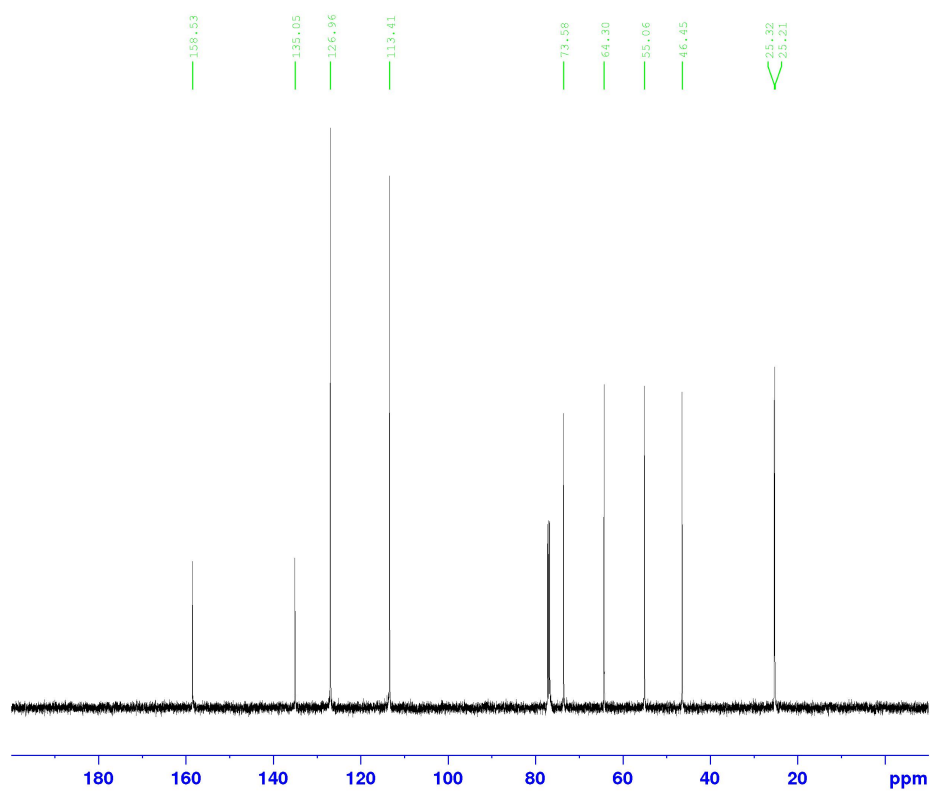

Figure S19  $^{13}\text{C}\{^1\text{H}\}$  NMR spectra of ( $\alpha R,2S$ )-7 ( $\text{CDCl}_3$ , 125 MHz)

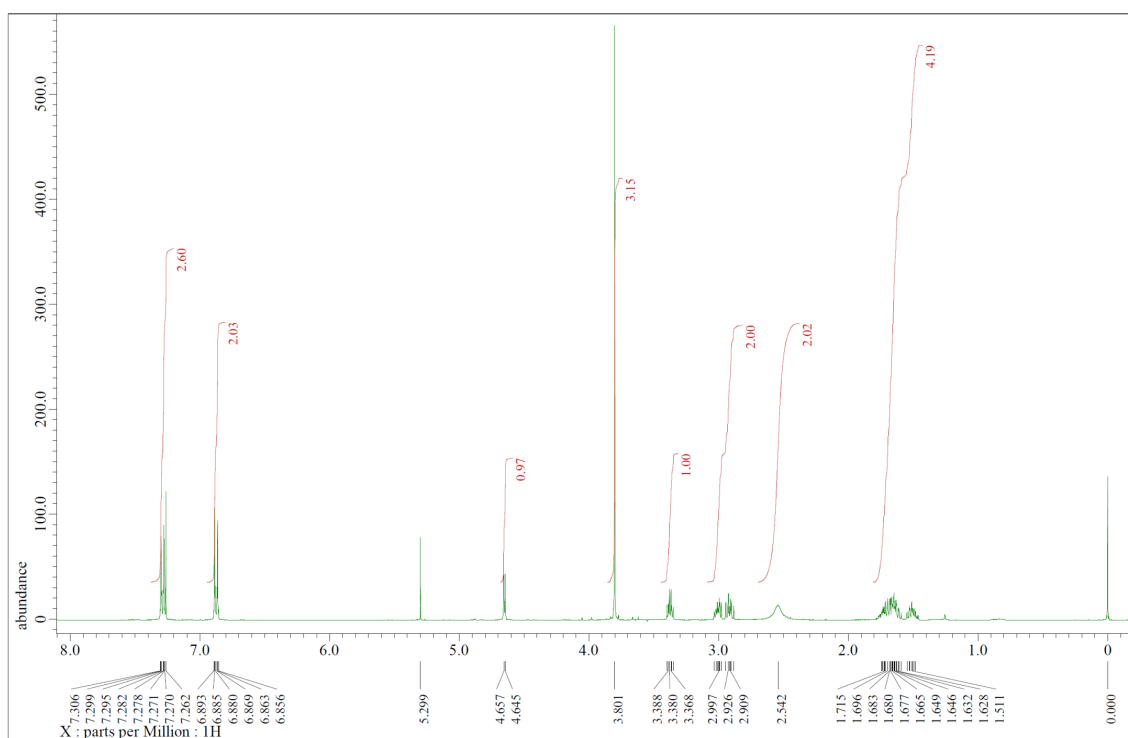

Figure S20  $^1\text{H}$  NMR spectra of ( $\alpha S,2R$ )-7 ( $\text{CDCl}_3$ , 300 MHz)

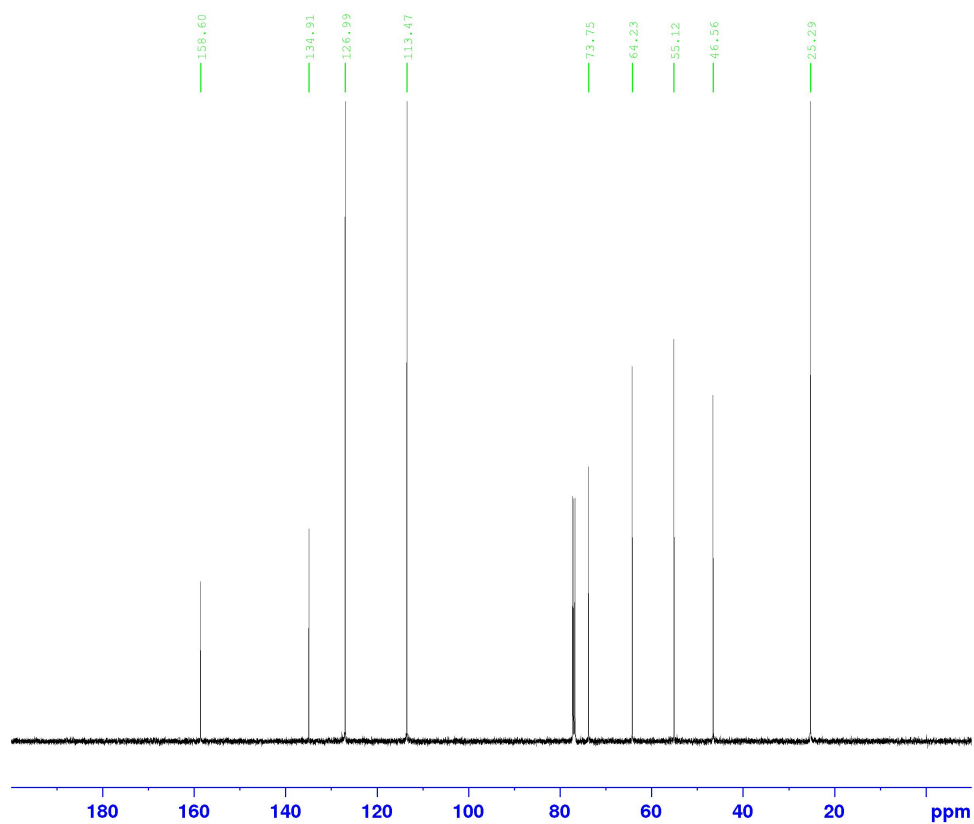

Figure S21  $^{13}\text{C}\{^1\text{H}\}$  NMR spectra of ( $\alpha S,2R$ )-7 ( $\text{CDCl}_3$ , 125 MHz)

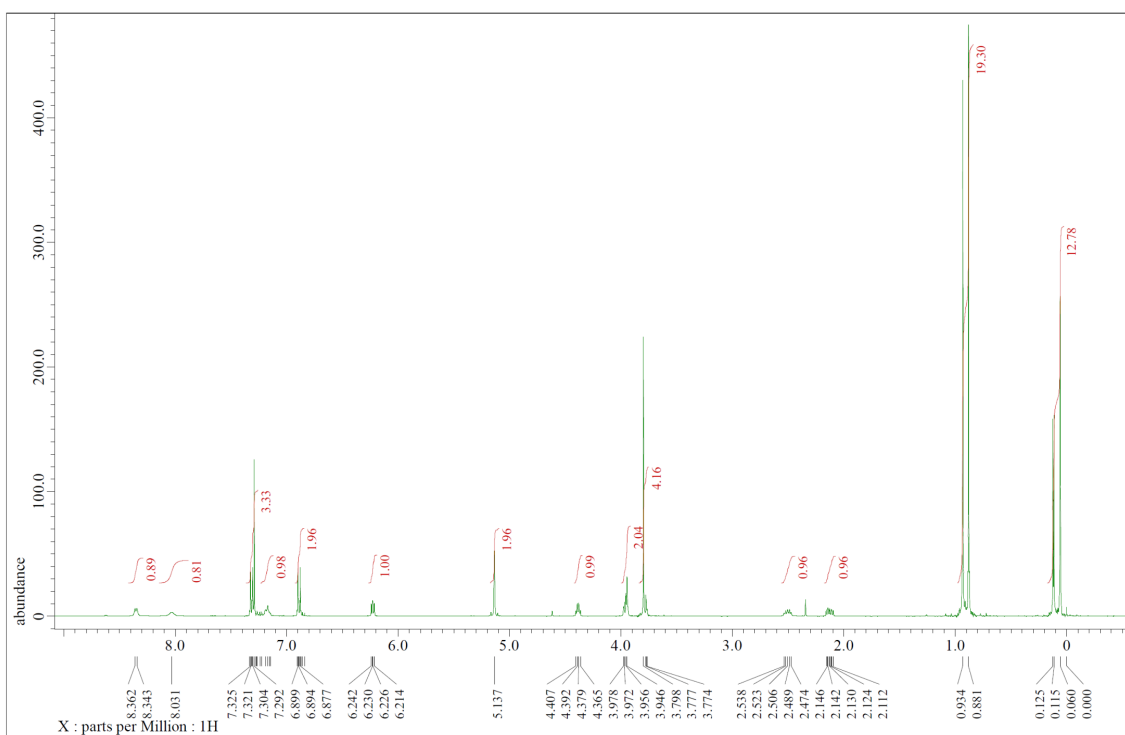

Figure S22 <sup>1</sup>H NMR spectra of **9** (CDCl<sub>3</sub>, 300 MHz)

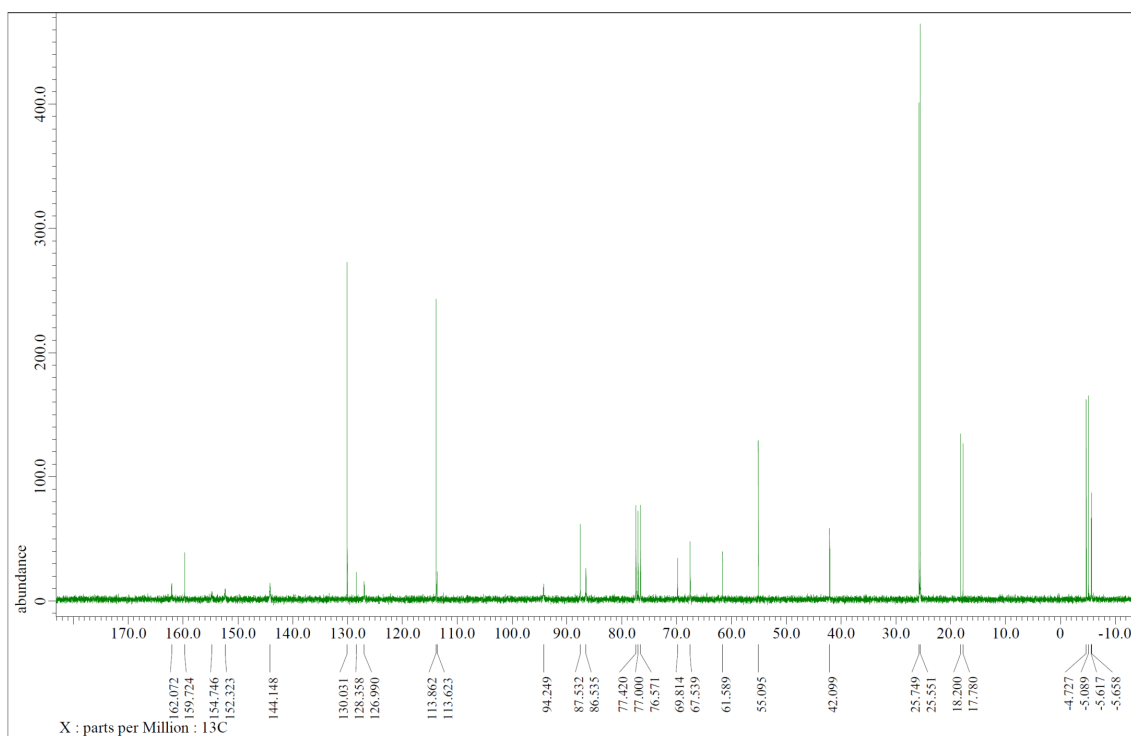

Figure S23 <sup>13</sup>C{<sup>1</sup>H} NMR spectra of **9** (CDCl<sub>3</sub>, 75 MHz)

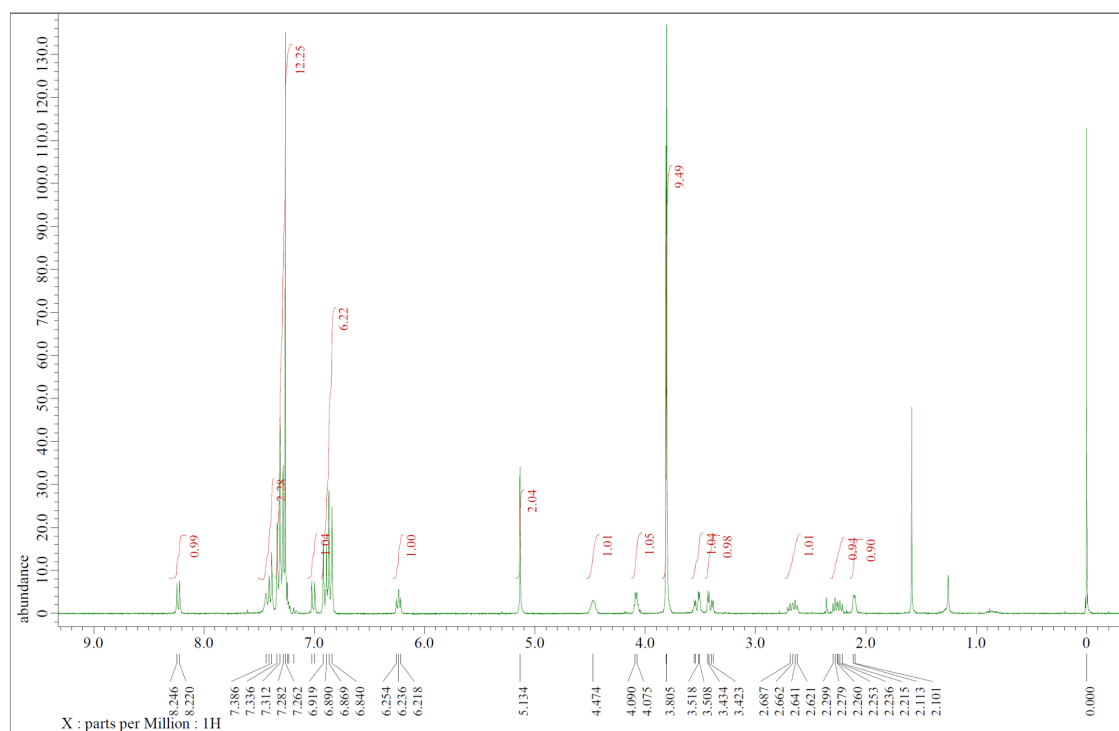

Figure S24  $^1\text{H}$  NMR spectra of **10** ( $\text{CDCl}_3$ , 300 MHz)

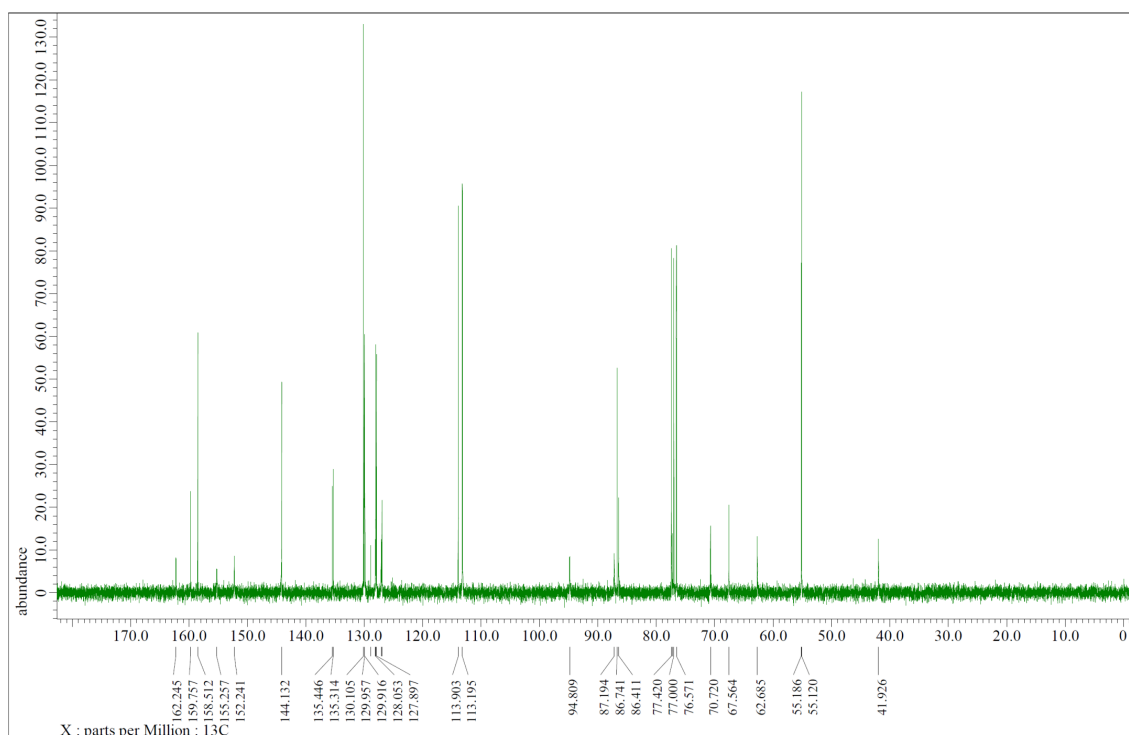

Figure S25  $^{13}\text{C}\{^1\text{H}\}$  NMR spectra of **10** ( $\text{CDCl}_3$ , 75 MHz)

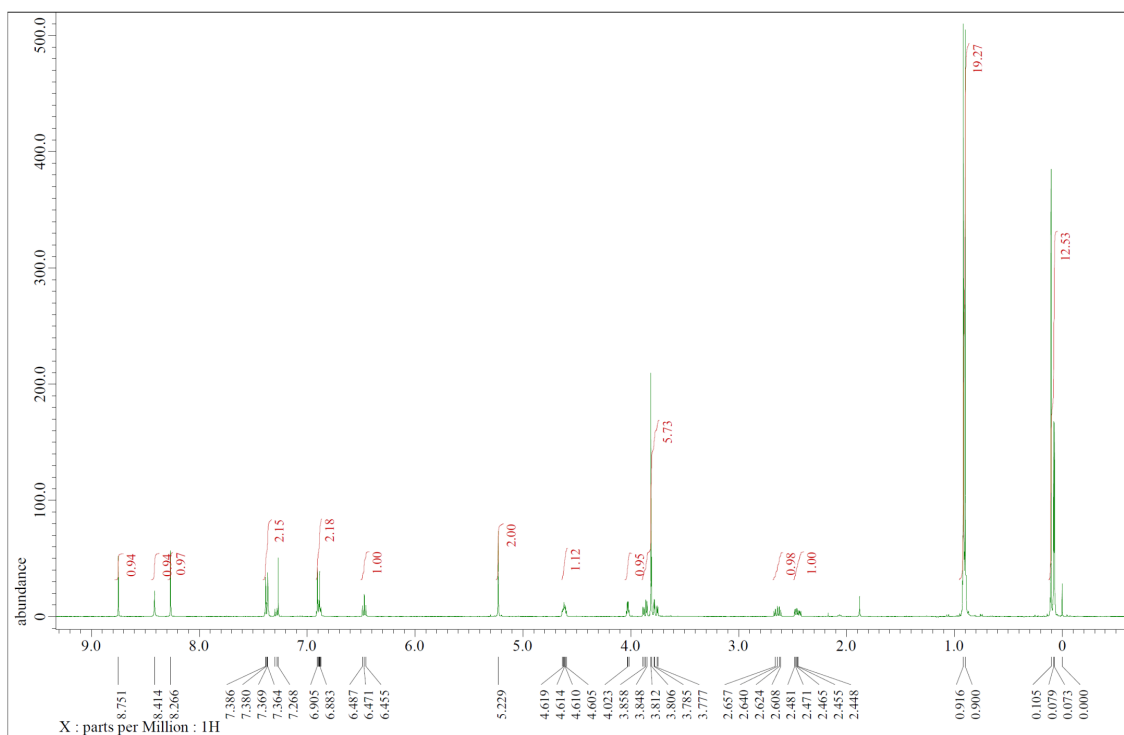

Figure S26 <sup>1</sup>H NMR spectra of **12** (CDCl<sub>3</sub>, 300 MHz)

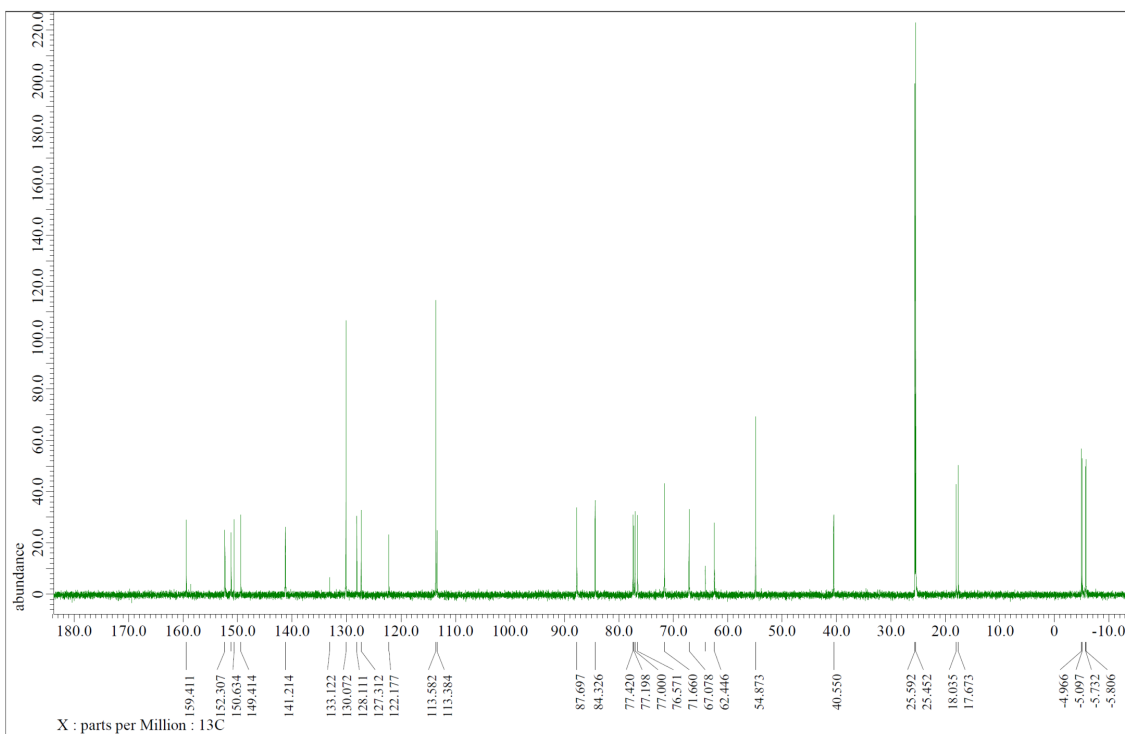

Figure S27 <sup>13</sup>C{<sup>1</sup>H} NMR spectra of **12** (CDCl<sub>3</sub>, 75 MHz)

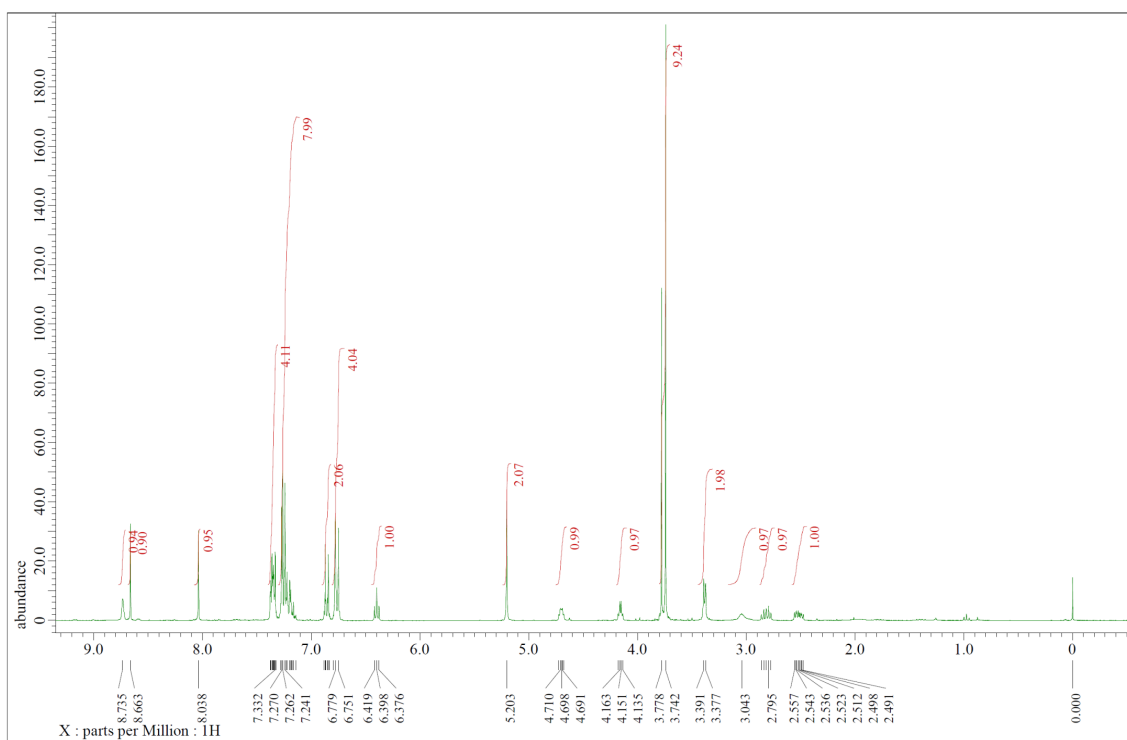

Figure S28 <sup>1</sup>H NMR spectra of **13** (CDCl<sub>3</sub>, 300 MHz)

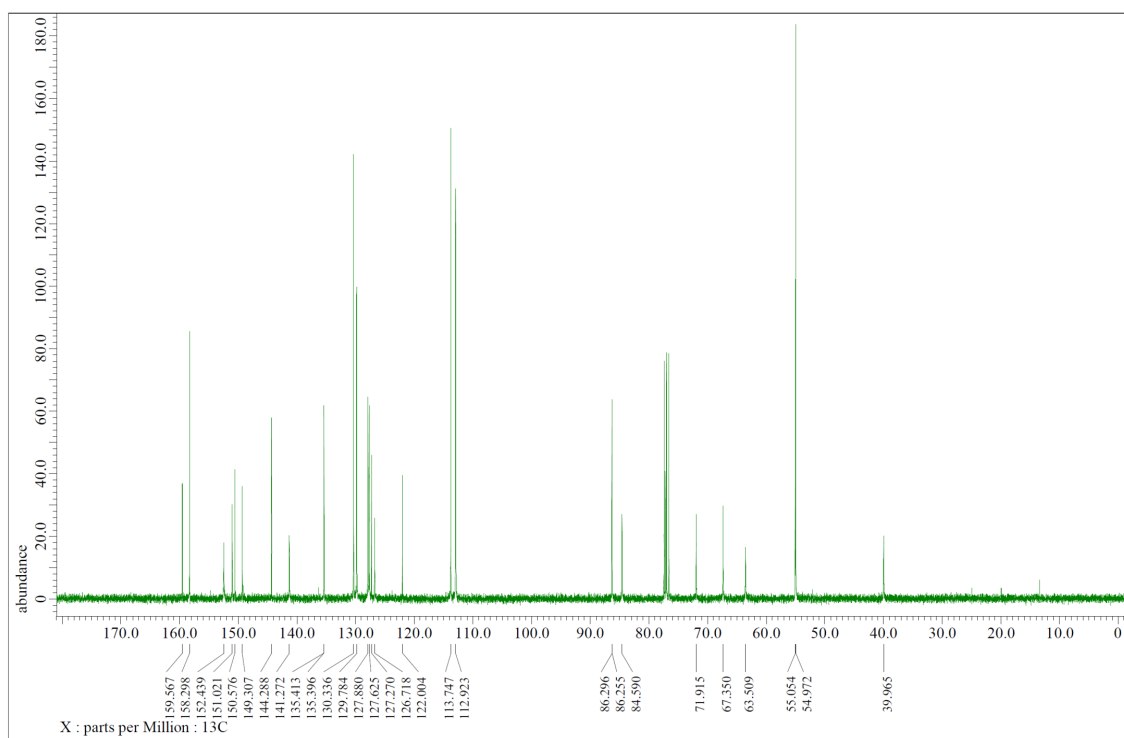

Figure S29 <sup>13</sup>C{<sup>1</sup>H} NMR spectra of **13** (CDCl<sub>3</sub>, 75 MHz)



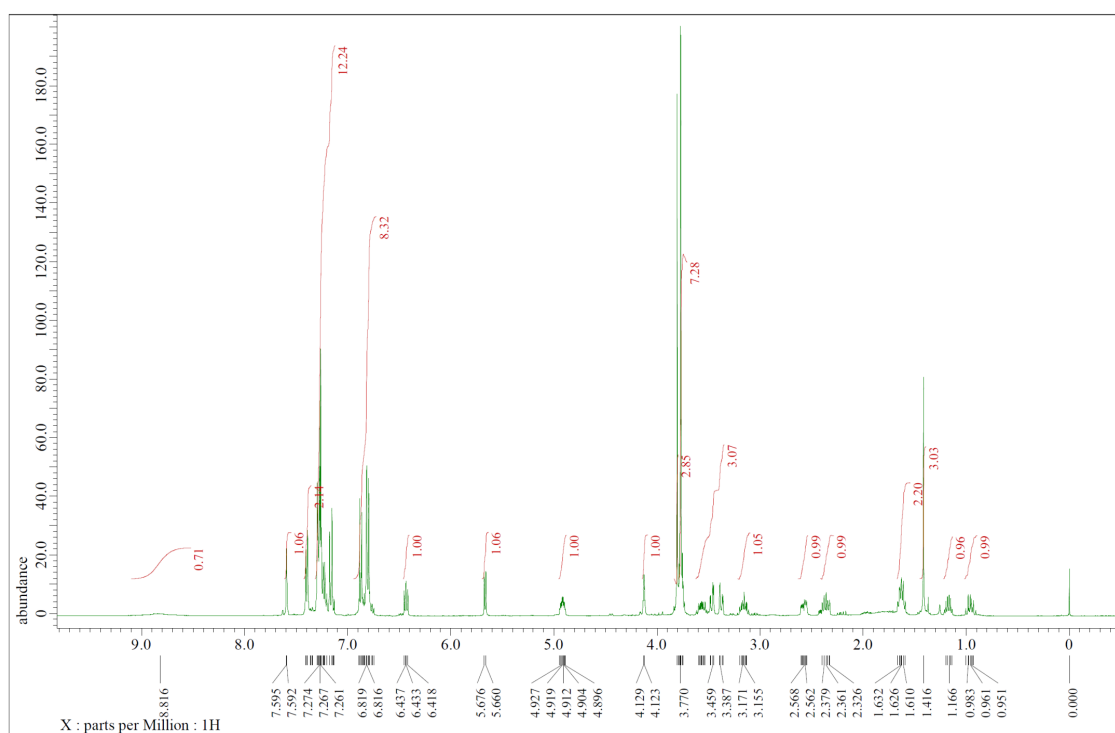

Figure S30 <sup>1</sup>H NMR spectra of (Rp)-15 (CDCl<sub>3</sub>, 400 MHz)

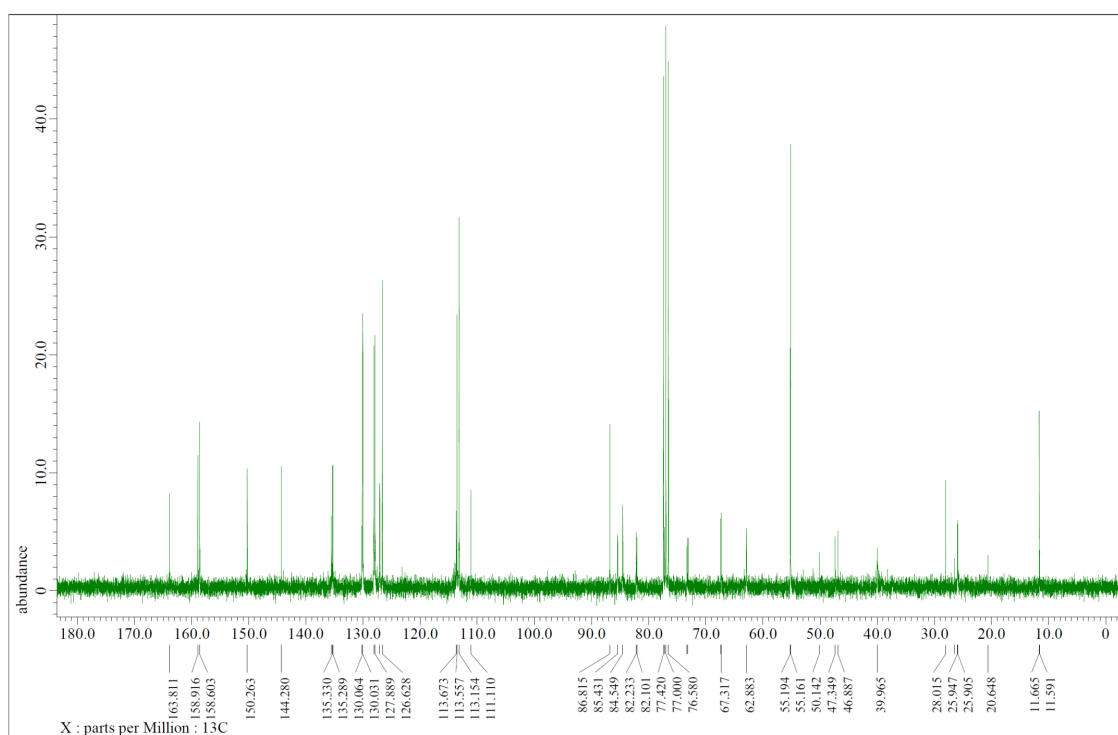

Figure S31 <sup>13</sup>C{<sup>1</sup>H} NMR spectra of (Rp)-15 (CDCl<sub>3</sub>, 75 MHz)

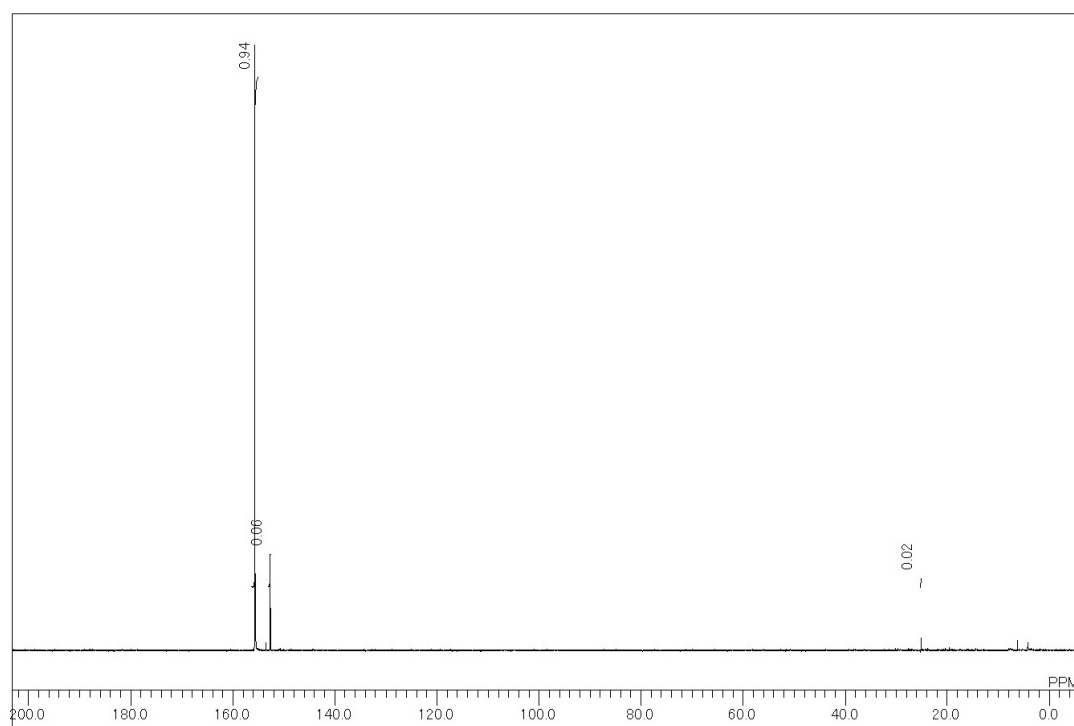

Figure S32  $^{31}\text{P}\{^1\text{H}\}$  NMR spectra of (*Rp*)-**15** ( $\text{CDCl}_3$ , 162 MHz)

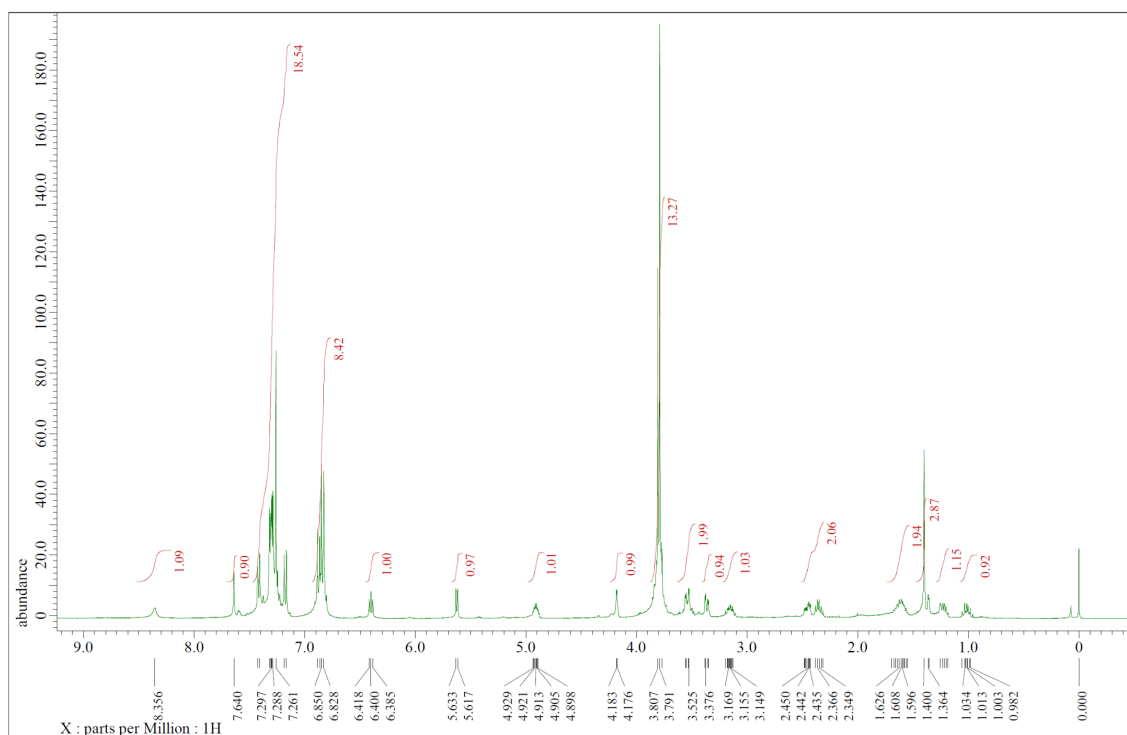

Figure S33  $^1\text{H}$  NMR spectra of (Sp)-15 ( $\text{CDCl}_3$ , 400 MHz)

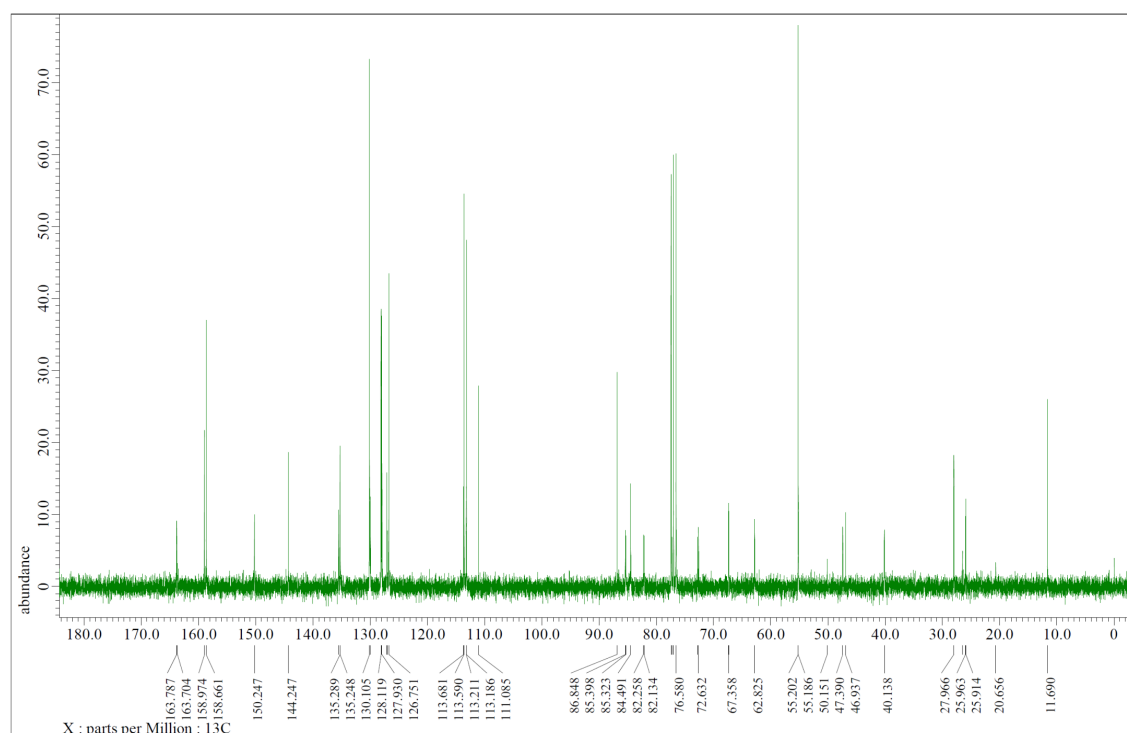

Figure S34  $^{13}\text{C}\{^1\text{H}\}$  NMR spectra of (Sp)-15 ( $\text{CDCl}_3$ , 75 MHz)

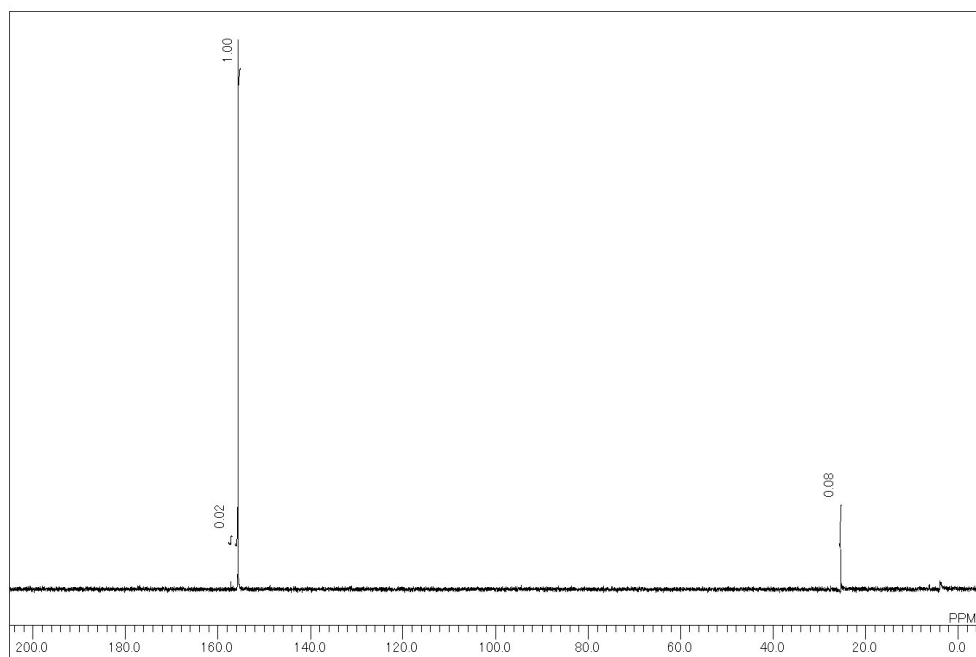

Figure S35  $^{31}\text{P}\{^1\text{H}\}$  NMR spectra of (*Sp*)-**15** ( $\text{CDCl}_3$ , 162 MHz)

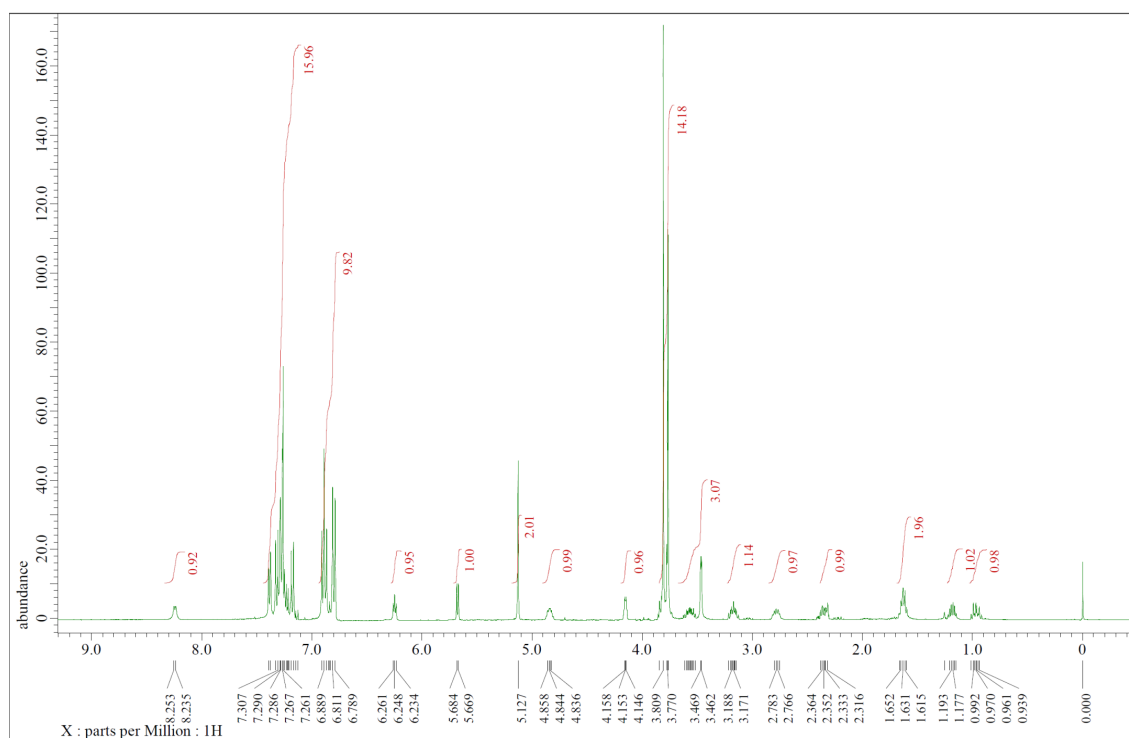

Figure S36  $^1\text{H}$  NMR spectra of (*R<sub>p</sub>*)-**16** ( $\text{CDCl}_3$ , 400 MHz)

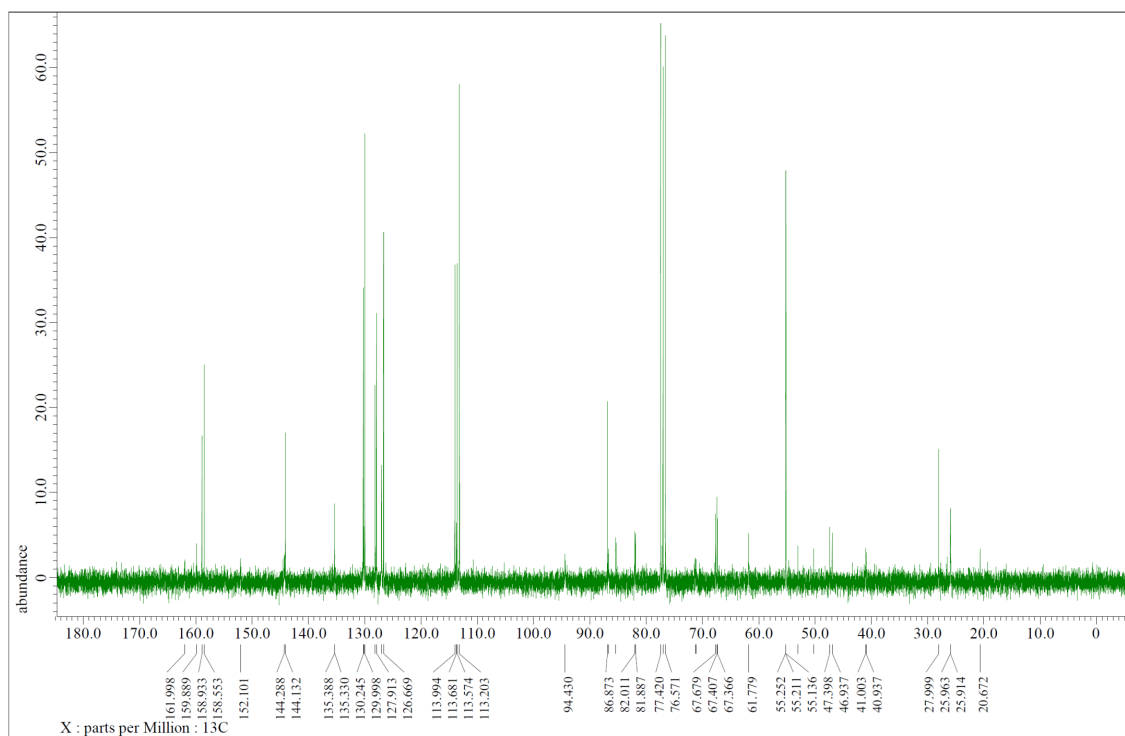

Figure S37  $^{13}\text{C}\{^1\text{H}\}$  NMR spectra of (*R<sub>p</sub>*)-**16** ( $\text{CDCl}_3$ , 75 MHz)

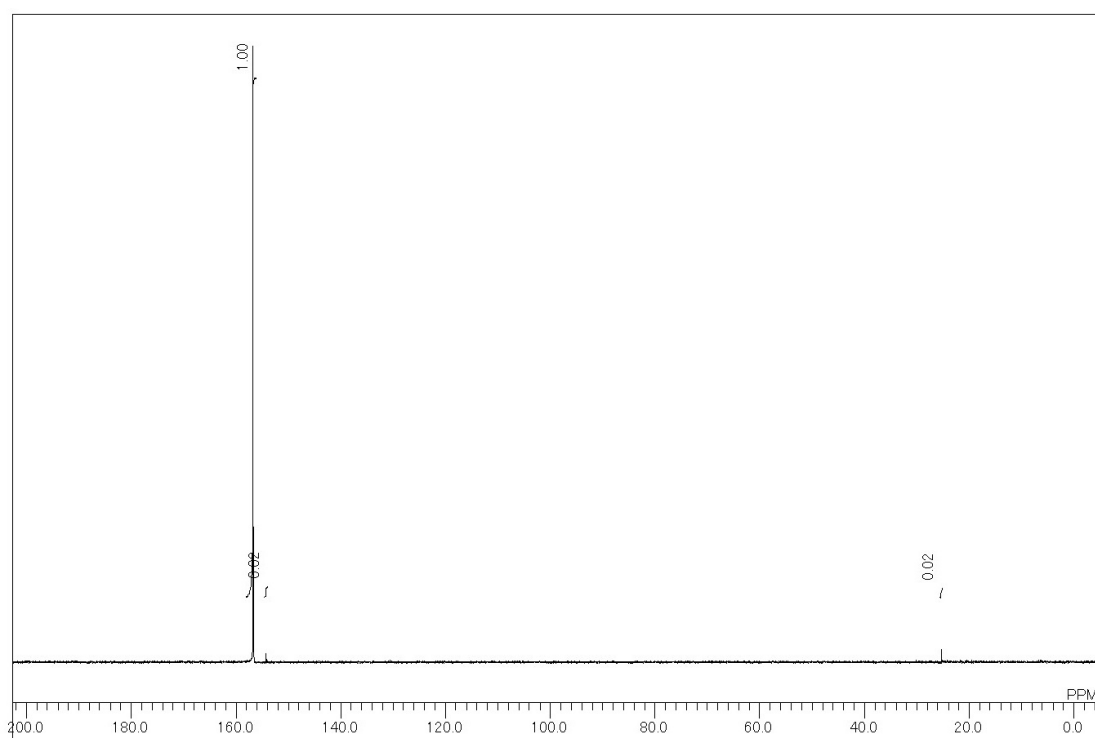

Figure S38  $^{31}\text{P}\{^1\text{H}\}$  NMR spectra of (*Rp*)-**16** ( $\text{CDCl}_3$ , 162 MHz)

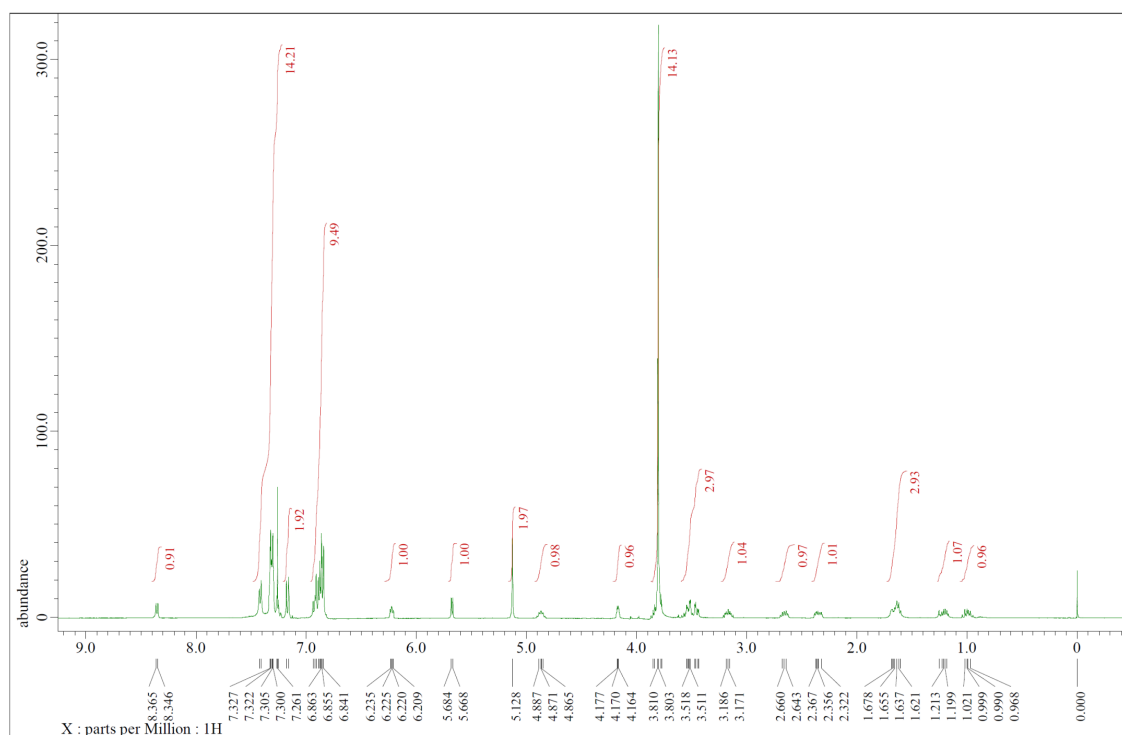

Figure S39  $^1\text{H}$  NMR spectra of (Sp)-16 ( $\text{CDCl}_3$ , 400 MHz)

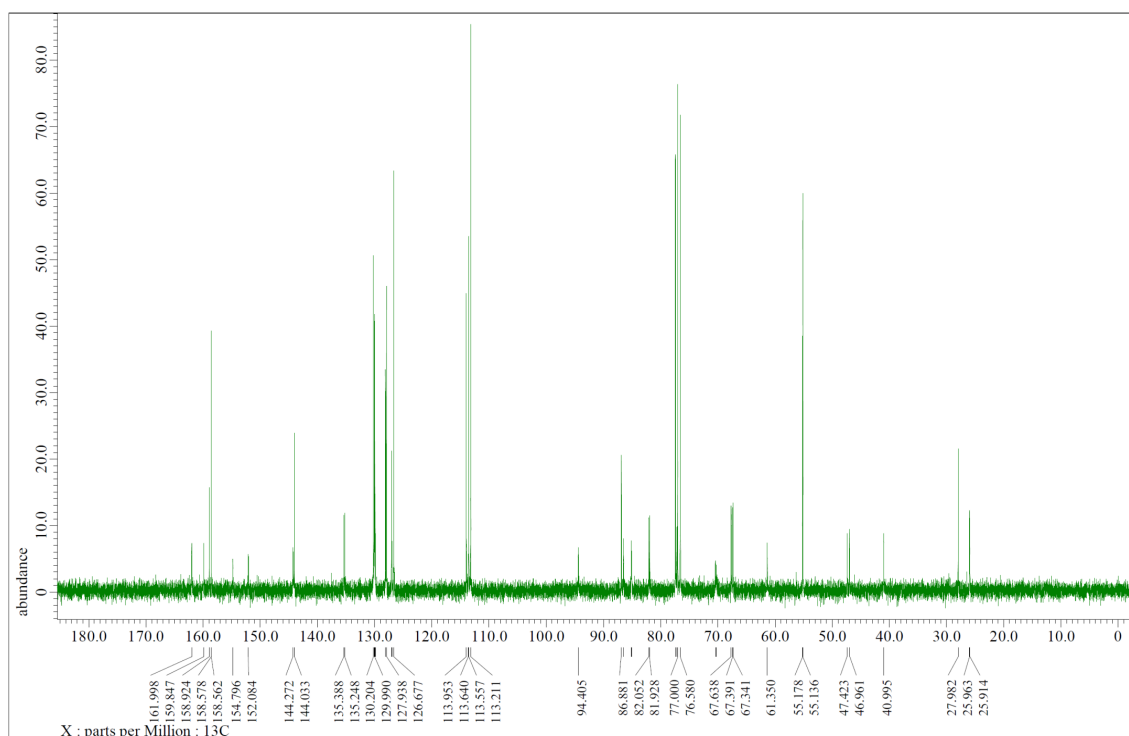

Figure S40  $^{13}\text{C}\{^1\text{H}\}$  NMR spectra of (Sp)-16 ( $\text{CDCl}_3$ , 75 MHz)

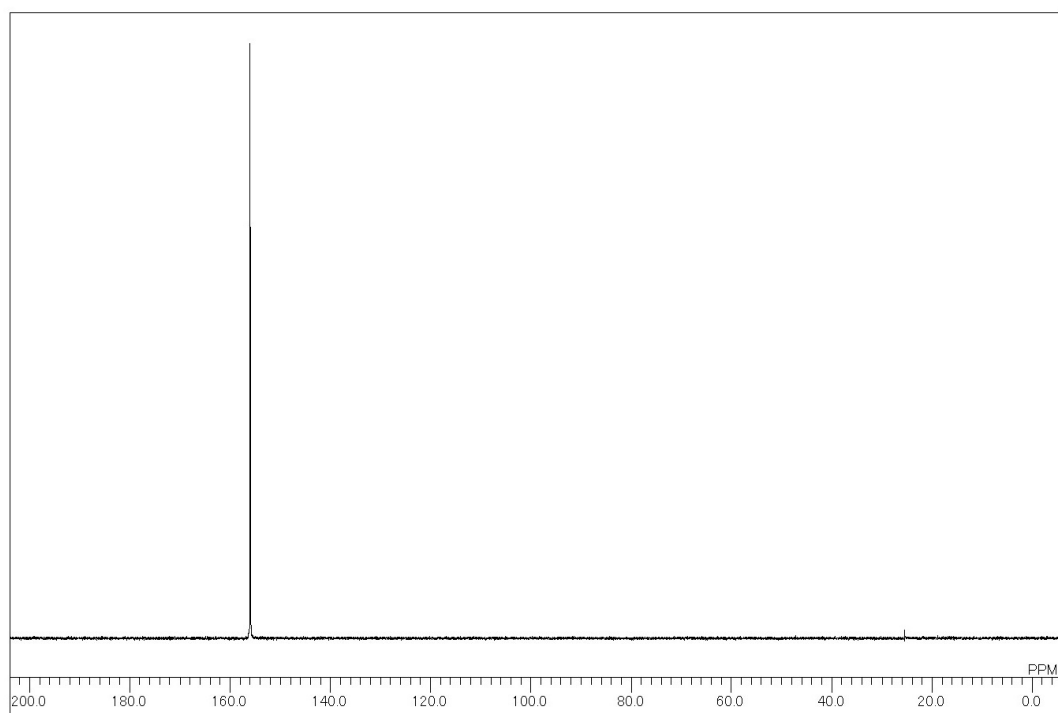

Figure S41  $^{31}\text{P}\{^1\text{H}\}$  NMR spectra of (*Sp*)-**16** ( $\text{CDCl}_3$ , 162 MHz)



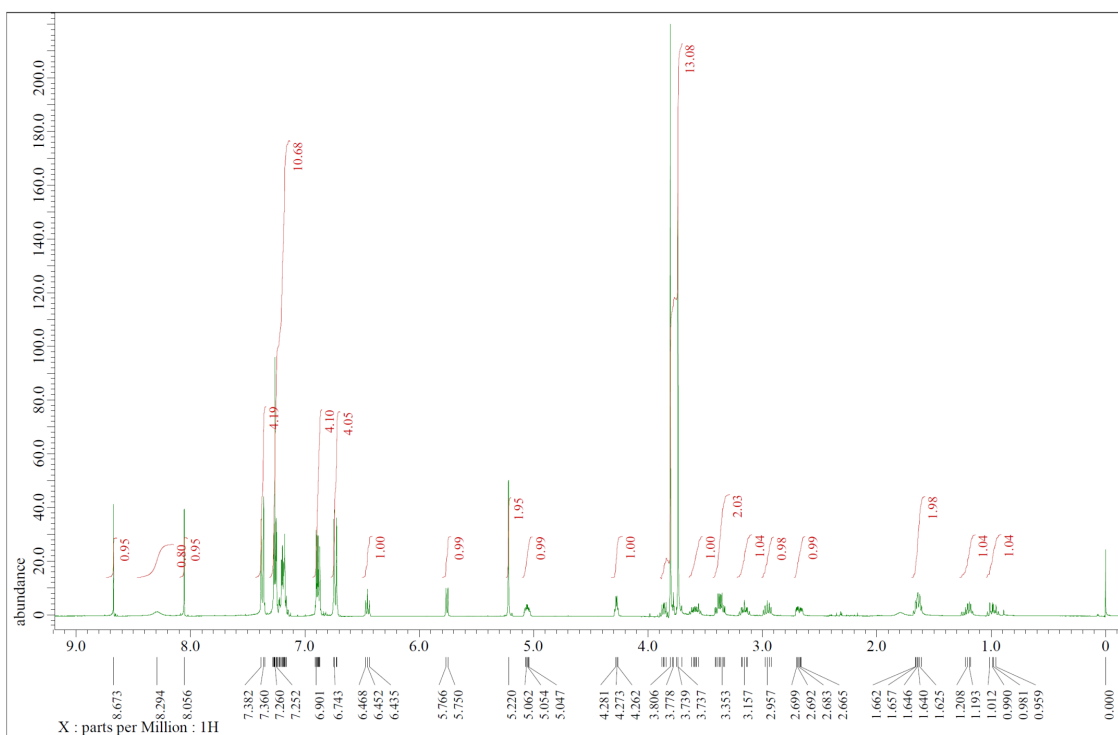

Figure S42  $^1\text{H}$  NMR spectra of (*Rp*)-**17** ( $\text{CDCl}_3$ , 400 MHz)

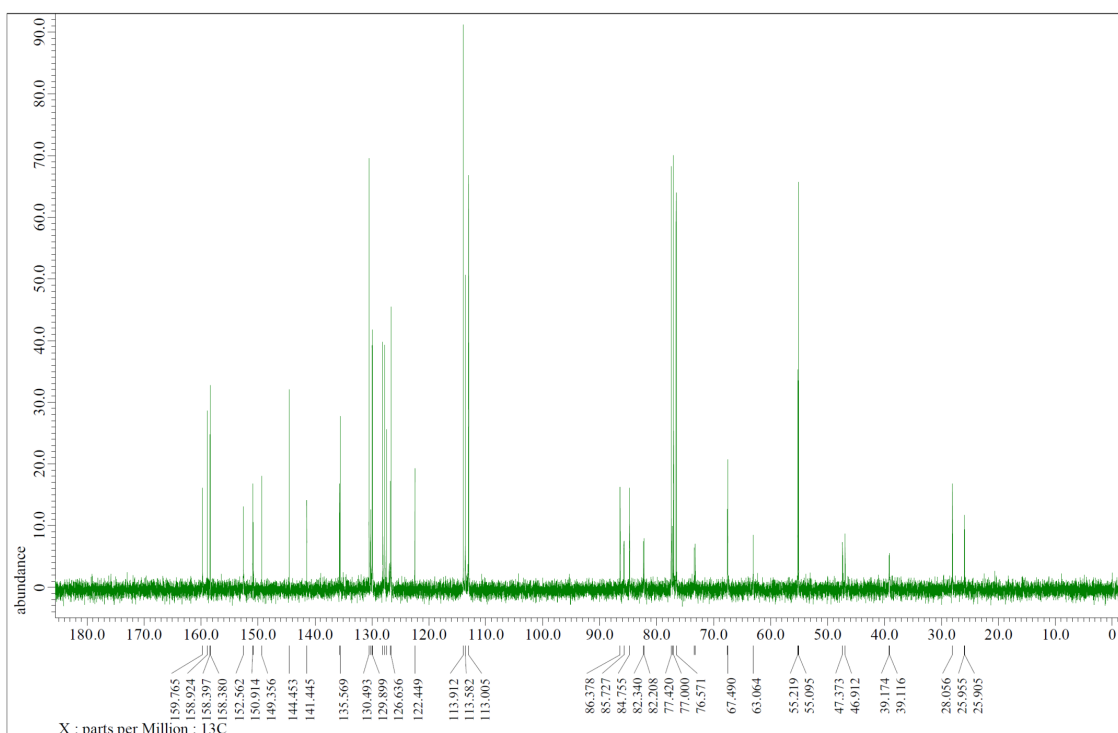

Figure S43  $^{13}\text{C}\{^1\text{H}\}$  NMR spectra of (*Rp*)-**17** ( $\text{CDCl}_3$ , 75 MHz)

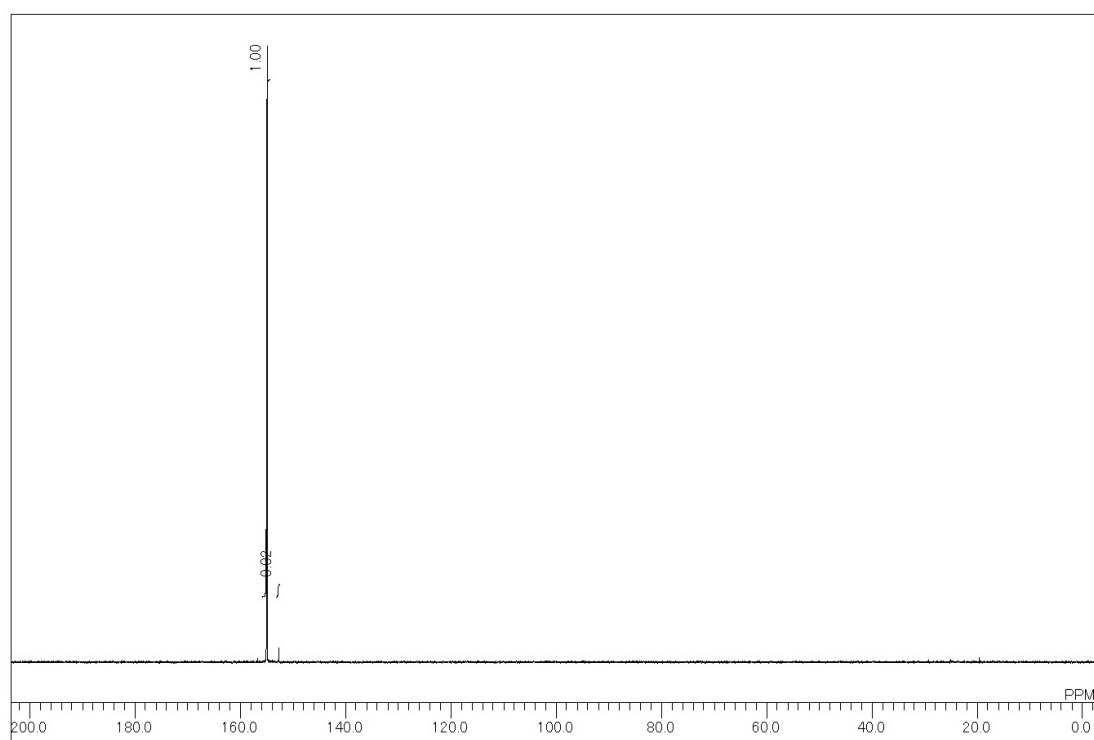

Figure S44  $^{31}\text{P}\{^1\text{H}\}$  NMR spectra of (*Rp*)-**17** ( $\text{CDCl}_3$ , 162 MHz)

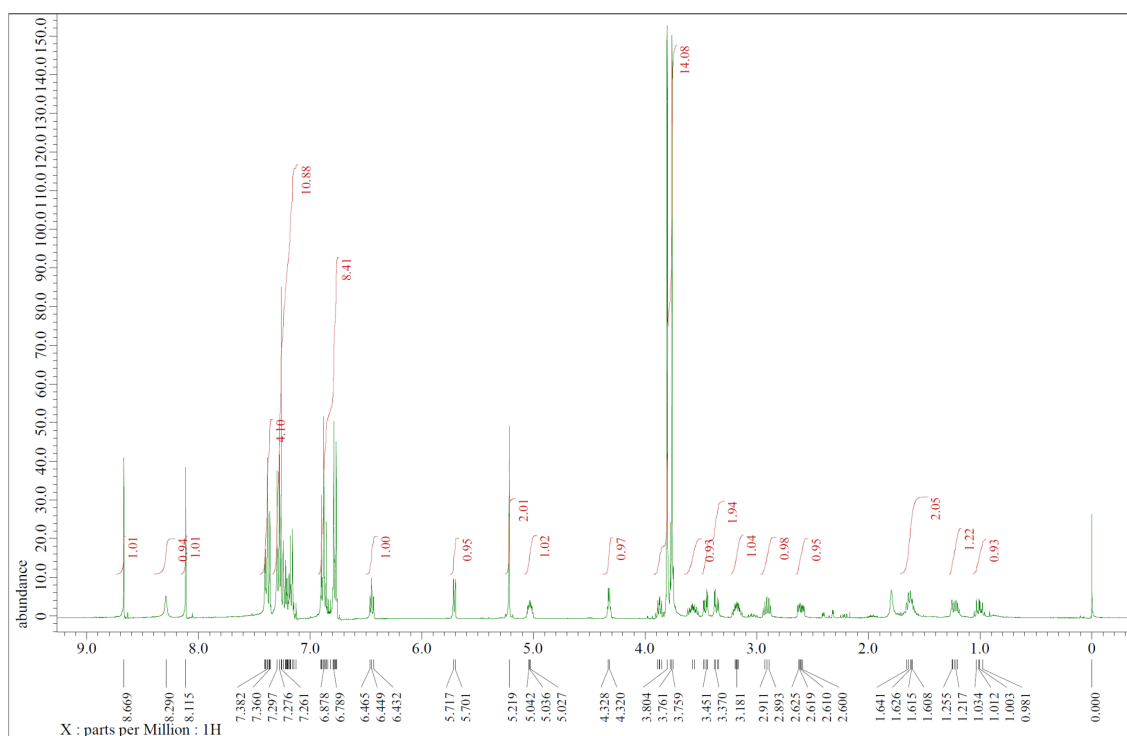

Figure S45 <sup>1</sup>H NMR spectra of (Sp)-17 (CDCl<sub>3</sub>, 400 MHz)

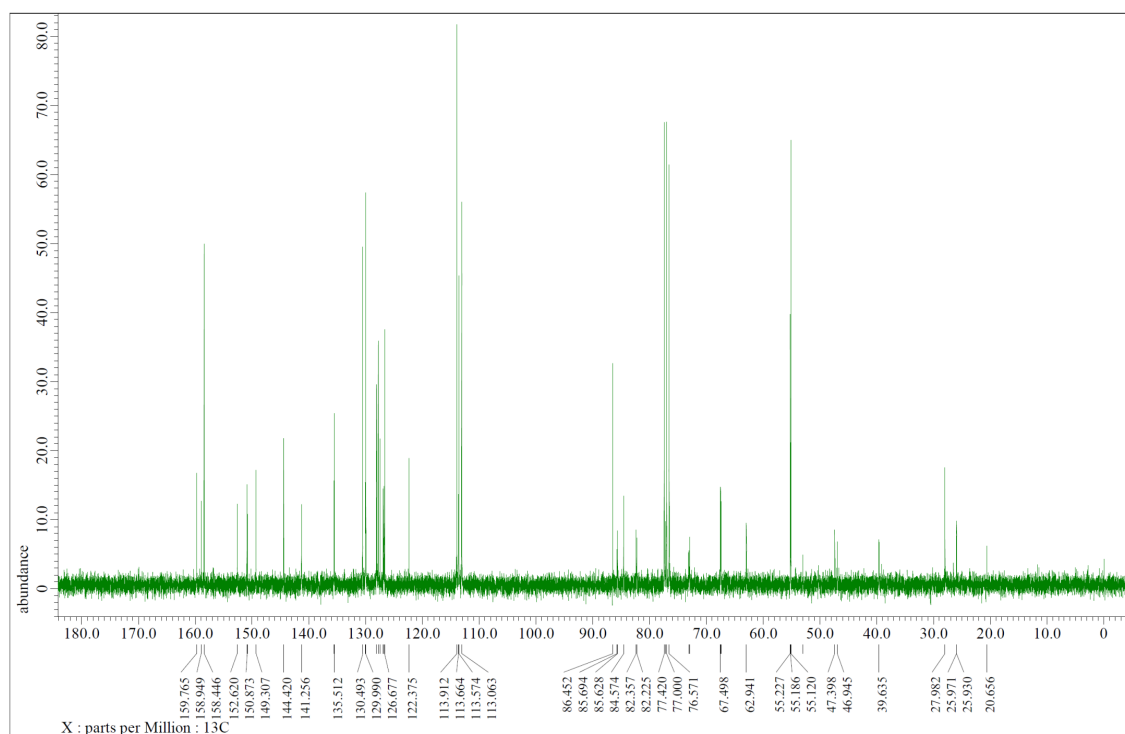

Figure S46 <sup>13</sup>C{<sup>1</sup>H} NMR spectra of (Sp)-17 (CDCl<sub>3</sub>, 75 MHz)

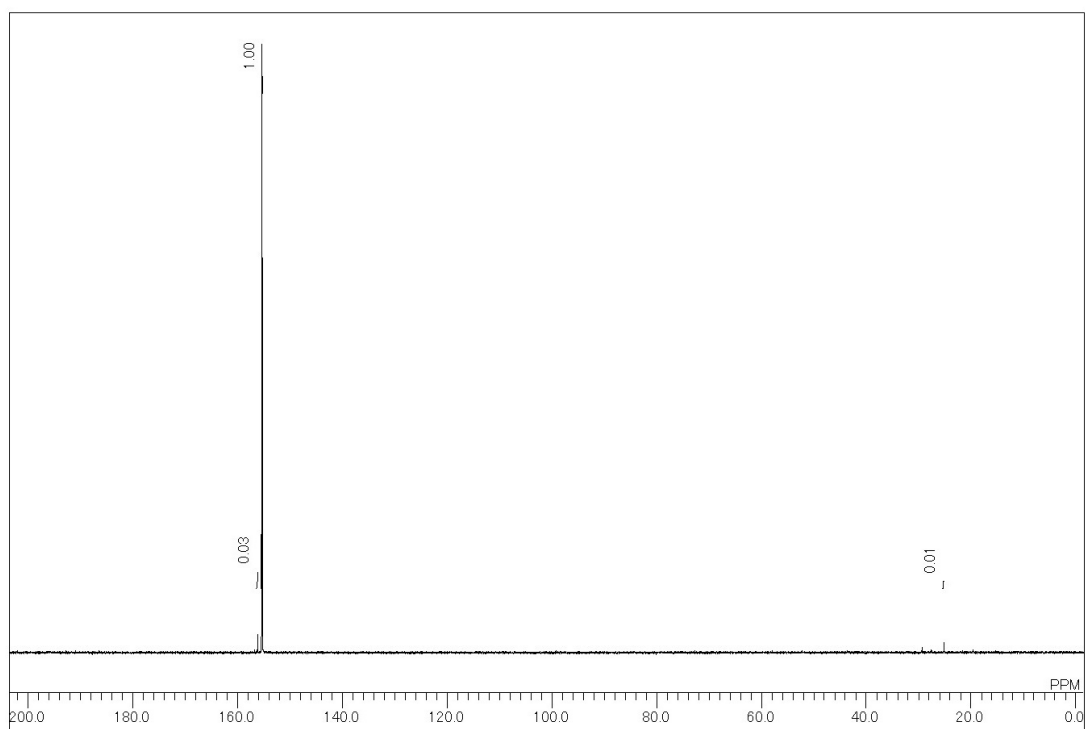

Figure S47  $^{31}\text{P}\{^1\text{H}\}$  NMR spectra of (*Sp*)-**17** ( $\text{CDCl}_3$ , 162 MHz)

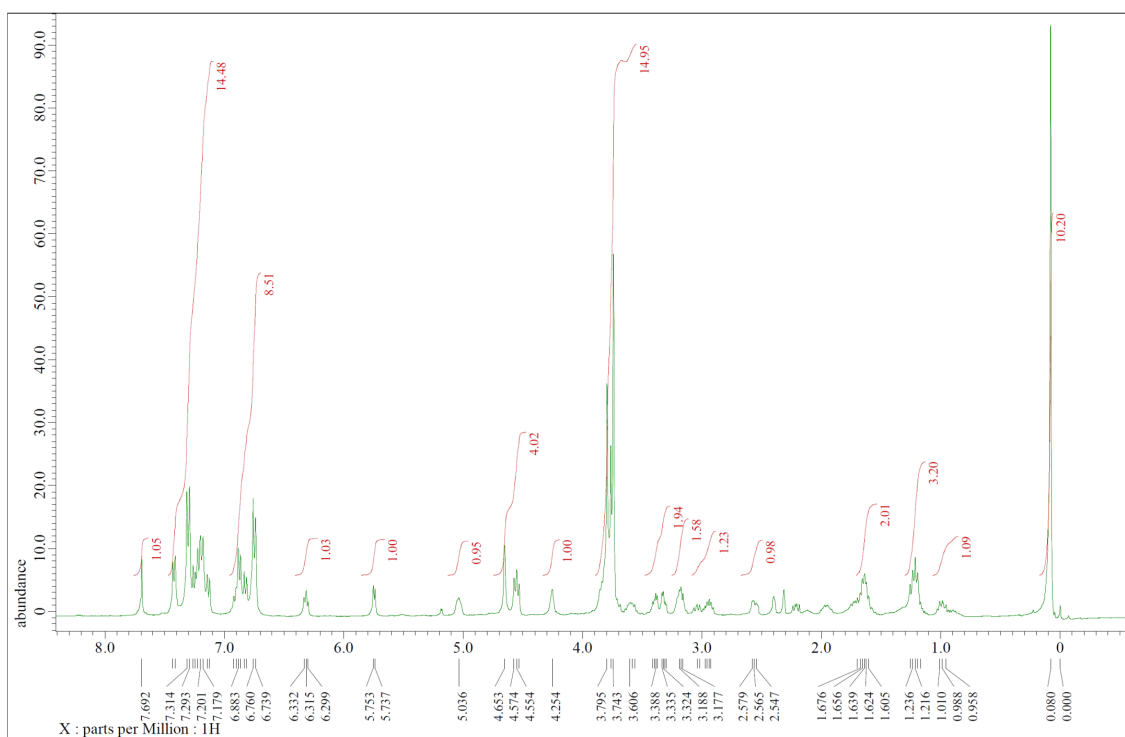

Figure S48 <sup>1</sup>H NMR spectra of (Rp)-18 (CDCl<sub>3</sub>, 400 MHz)

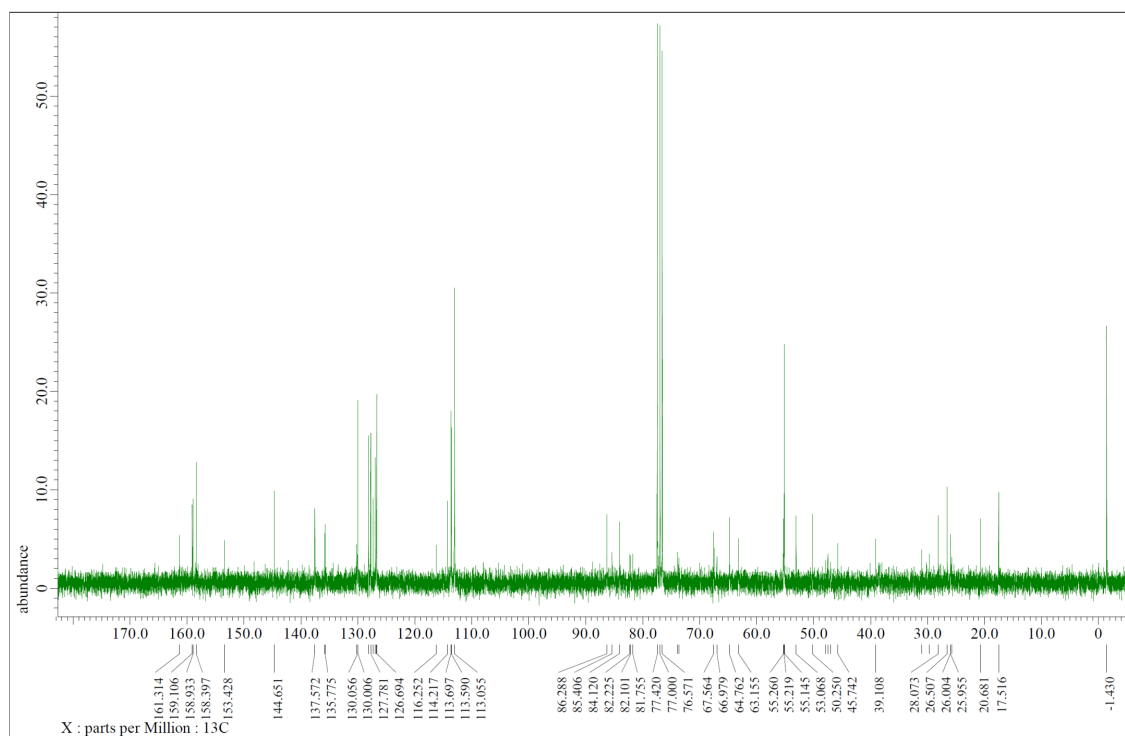

Figure S49 <sup>13</sup>C{<sup>1</sup>H} NMR spectra of (Rp)-18 (CDCl<sub>3</sub>, 75 MHz)

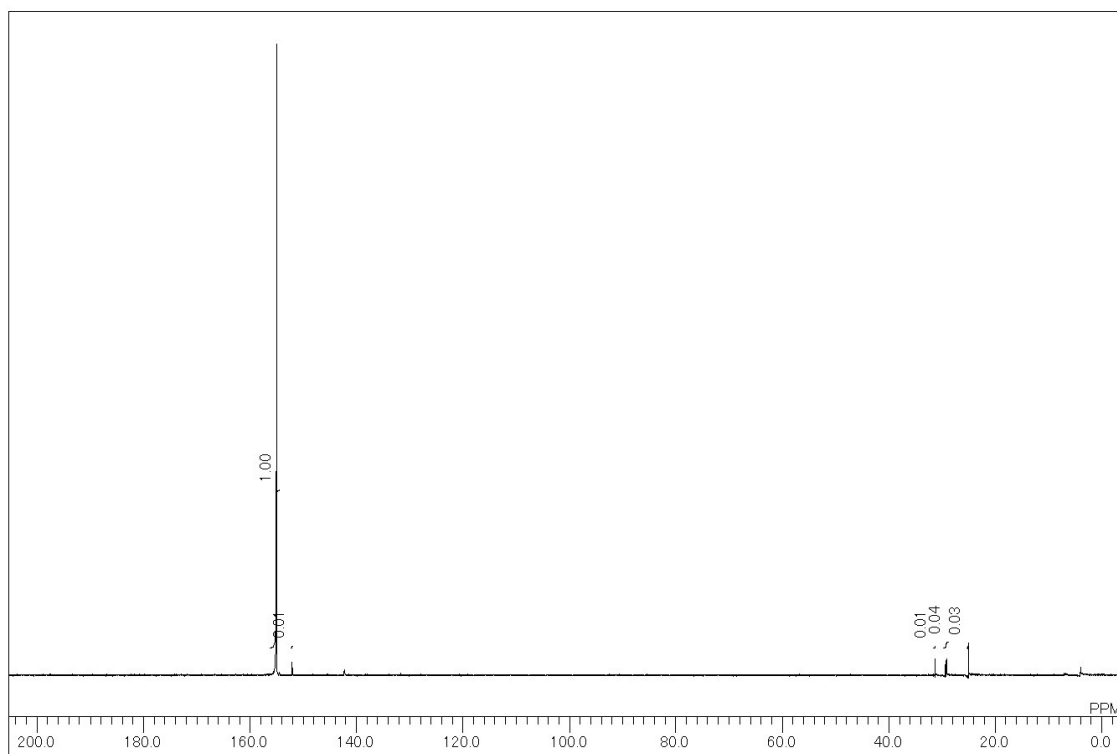

Figure S50  $^{31}\text{P}\{^1\text{H}\}$  NMR spectra of (*Rp*)-**18** ( $\text{CDCl}_3$ , 162 MHz)

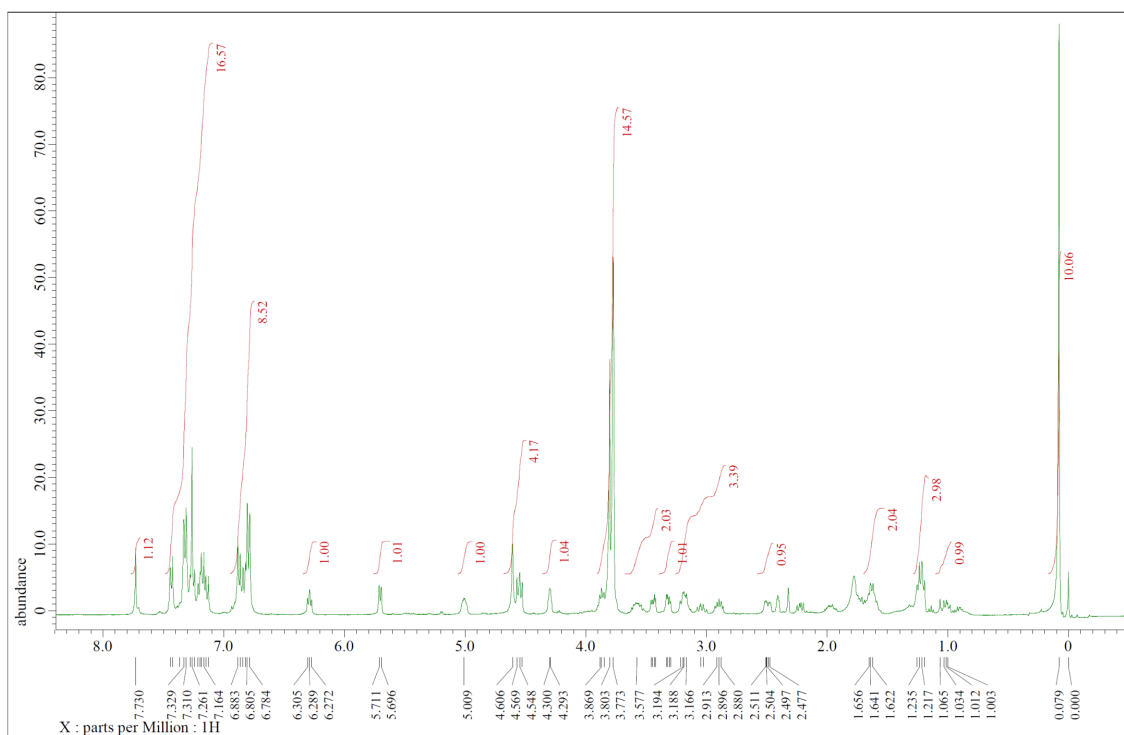

Figure S51  $^1\text{H}$  NMR spectra of (Sp)-18 ( $\text{CDCl}_3$ , 400 MHz)

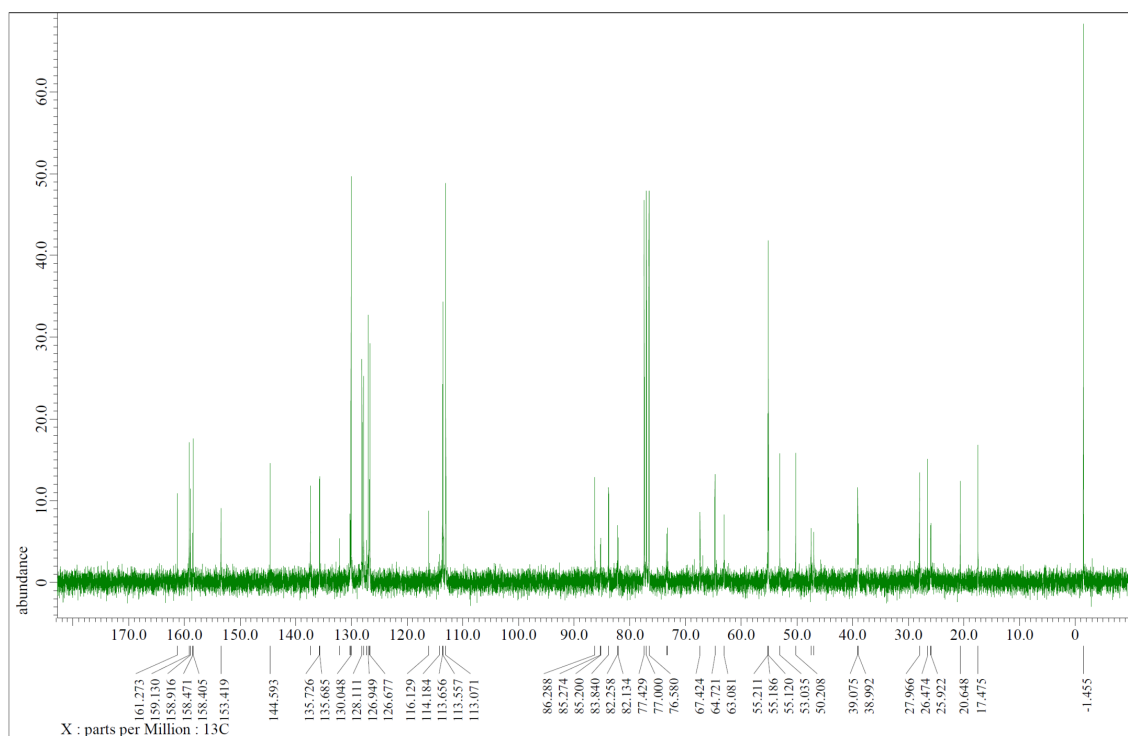

Figure S52  $^{13}\text{C}\{^1\text{H}\}$  NMR spectra of (Sp)-18 ( $\text{CDCl}_3$ , 75 MHz)

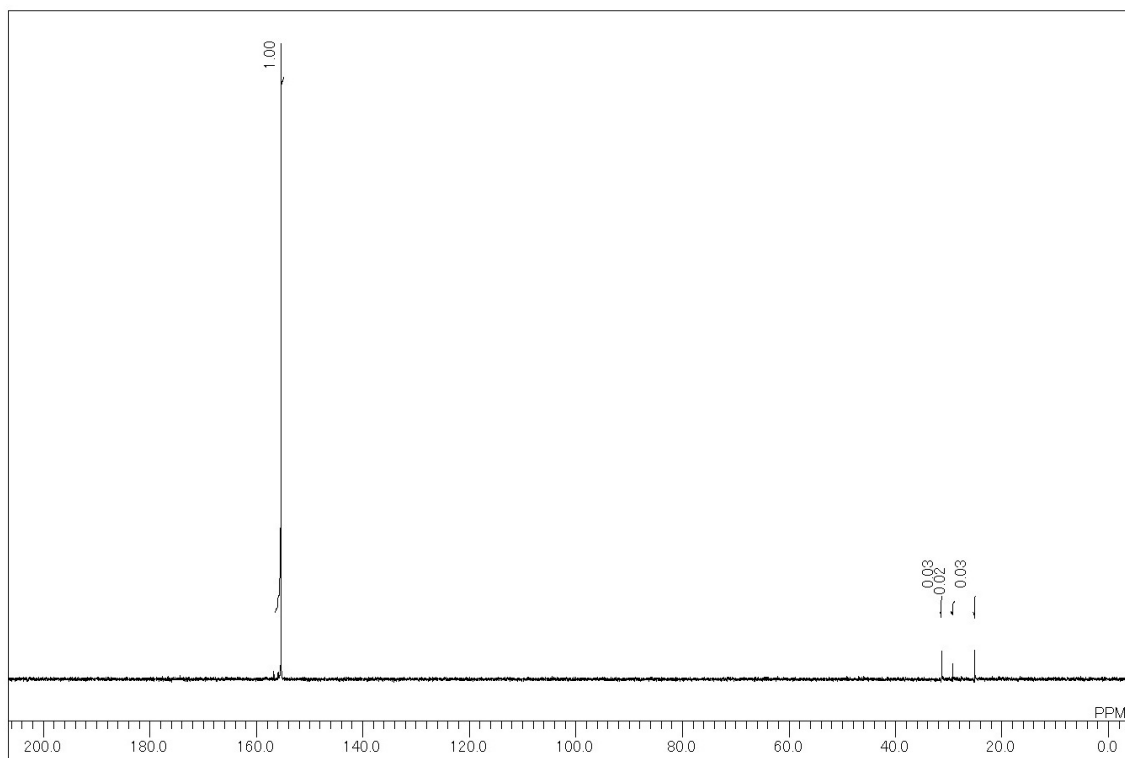

Figure S53  $^{31}\text{P}\{^1\text{H}\}$  NMR spectra of (*Sp*)-**18** ( $\text{CDCl}_3$ , 162 MHz)
